1 **An atlas of plant full-length RNA reveals tissue-specific and**  
2 **evolutionarily-conserved regulation of poly(A) tail length**

3

4 Jinbu Jia<sup>1,2,3†</sup>, Wenqin Lu<sup>1,2,3†</sup>, Bo Liu<sup>1,2,3</sup>, Yiming Yu<sup>1,2,3</sup>, Xianhao Jin<sup>1,2,3</sup>, Yi Shu<sup>1,2,3</sup>,  
5 Yanping Long<sup>1,2,3</sup>, and Jixian Zhai<sup>1,2,3\*</sup>

6

7 **Affiliations:**

8 <sup>1</sup> Department of Biology, School of Life Sciences, Southern University of Science and  
9 Technology, Shenzhen 518055, China;

10 <sup>2</sup> Institute of Plant and Food Science, Southern University of Science and Technology, Shenzhen  
11 518055, China;

12 <sup>3</sup> Key Laboratory of Molecular Design for Plant Cell Factory of Guangdong Higher Education  
13 Institutes, Southern University of Science and Technology, Shenzhen 518055, China.

14

15 † These authors contributed equally to this work.

16 \* Correspondence: [zhaijx@sustech.edu.cn](mailto:zhaijx@sustech.edu.cn) (J.Z.)

## 17 **Introductory paragraph**

18 Poly(A) tail is a hallmark of eukaryotic mRNA and its length plays an essential role in regulating  
19 mRNA metabolism<sup>1-3</sup>. However, a comprehensive resource for plant poly(A) tail length has yet to  
20 be established. Here, we applied a poly(A)-enrichment-free, Nanopore-based method<sup>4,5</sup> to profile  
21 full-length RNA with poly(A) tail information in plants. Our atlas contains over 120 million  
22 polyadenylated mRNA molecules from seven different tissues of Arabidopsis, as well as the shoot  
23 tissue of maize, soybean and rice. In most tissues, the size of plant poly(A) tails shows peaks at  
24 approximately 20 and 45 nt, presumably the sizes protected by one and two poly(A) binding  
25 proteins (PABP), respectively<sup>2,6</sup>, while the poly(A) tails in pollen exhibit a distinct pattern with  
26 strong peaks centered at 55 and 80 nt. Moreover, poly(A) tail length is regulated in a gene-specific  
27 manner — mRNAs with short half-lives in general have long poly(A) tails, while mRNAs with  
28 long half-lives are featured with relatively short poly(A) tails that peak at ~45 nt, suggesting that  
29 protection of poly(A) tail in this size by PABP is essential for mRNA stability. Across species,  
30 poly(A) tails in the nucleus are almost twice as long as in the cytoplasm, implying a conserved  
31 rapid shortening process of poly(A) tail occurs before the mRNA is stabilized in cytoplasm. Our  
32 comprehensive dataset lays the groundwork for future functional and evolutionary studies on  
33 poly(A) tail length regulation in plants.

34

## 35 **Main text**

36 A non-template poly(A) tail is the hallmark of eukaryotic mRNA<sup>1-3</sup> and is vital in promoting  
37 translation and protecting mRNAs integrity with the help of cytoplasmic poly(A) binding proteins  
38 (PABPC)<sup>2,7,8</sup>. The length of the poly(A) tail is dynamically regulated by poly(A) polymerase and  
39 deadenylase, and shorting poly(A) tails to a certain threshold would release PABPC and trigger

40 mRNA decay<sup>2,3,9-12</sup>. A growing body of evidence reveals that altering poly(A) tail length plays  
41 important role in regulating gene expression<sup>2,9,13,14</sup>. In the last decade, a few high-throughput  
42 Illumina-based methods have been developed for genome-wide characterization of poly(A) tail  
43 length, including PAL-seq<sup>13</sup>, TAIL-seq<sup>15</sup>, mTAIL-seq<sup>16</sup>, PAT-seq<sup>17</sup> and TED-seq<sup>18</sup>. Advances in  
44 long-read sequencing platforms such as PacBio and Nanopore have also enabled the development  
45 of methods that detect full-length mRNA with poly(A) tail information, such as FLAM-seq<sup>19</sup>,  
46 PAIso-seq<sup>20</sup>, Nanopore direct RNA sequencing (DRS)<sup>21-23</sup>, and one developed by our group named  
47 FLEP-seq (Full-Length Elongating and Polyadenylated RNA sequencing)<sup>4,5</sup>. However, existing  
48 resources on plant poly(A) tails are still limited<sup>8,13,21,24-26</sup>. Therefore, establishing a comprehensive  
49 landscape for poly(A) tail length from various tissue types and in different species would greatly  
50 facilitate the study of poly(A) regulation in plants.

51  
52 Here, for low-input and cost-efficient detection of poly(A) tails, we further optimized FLEP-seq  
53 procedure for studying total RNA and streamlined library construction with the newly released  
54 Nanopore PCR-cDNA sequencing kit which uses ligase-free attachment of rapid sequencing  
55 adapter to bypass the steps of ds-cDNA repair, A-tailing and adapter ligation — we named this  
56 new version of the protocol as FLEP-seq2 ([Fig. 1a](#) and [Fig. S1](#)). Because FLEP-seq is originally  
57 designed to detect nascent RNAs that may or may not have a poly(A) tail, it does not involve any  
58 step for selecting poly(A) tail. This turns out to be a unique advantage for unbiased measurement  
59 of poly(A) tail length, as all other long-read methods (FLAM-seq, PAIso-seq, and DRS) use oligo-  
60 dT to select poly(A)+ mRNAs, which could disfavor mRNAs with a short poly(A) tail ([Fig. 1a](#)).  
61 Indeed, compared to published DRS data of the same tissue<sup>21</sup>, FLEP-seq2 detects more transcripts  
62 with short poly(A) tail, and the poly(A) length distribution of transcripts shows the highest peak

63 at ~20 nucleotides (nt) (Fig. 1b, upper panel). Despite this slight difference, the overall poly(A)  
64 length distributions obtained by FLEP-seq2 and DRS are highly similar (Fig. 1b, upper panel).  
65 The median poly(A) length of genes between FLEP-seq2 and DRS ( $r=0.72$ ) (Fig. 1b, lower panel,  
66 Fig. S2a), as well as between the two biological replicates of FLEP-seq2 ( $r=0.87$ ) (Fig. S2b), are  
67 highly consistent. In addition, FLEP-seq2 has a significant advantage in term of output per  
68 Nanopore flow cell compared to DRS — on a regular Nanopore MinION flow cell, one FLEP-  
69 seq2 library can yield ~10-20 million raw reads (Fig. 1a, Fig. 1d), whereas the output of DRS on  
70 the same MinION flow cell is only ~1 million<sup>21,22</sup>. FLEP-seq2 also uses much less input RNA than  
71 DRS. DRS requires 500 to 1000 ng polyadenylated RNA<sup>21,22</sup>, while FLEP-seq2 can start with as  
72 little as 500 ng total RNA. The full-length information obtained by FLEP-seq2 also enables us to  
73 simultaneously track the splicing status, poly(A) site position and poly(A) tail length of each  
74 transcript (Fig. 1c). These results demonstrated that FLEP-seq2 is an unbiased, robust, and high-  
75 throughput method for measuring poly(A) tail length; therefore, we chose FLEP-seq2 for a  
76 comprehensive characterization of poly(A) tail in plants.

77  
78 To establish a comprehensive atlas to investigate the tissue-specificity and evolutionary  
79 conservation of poly(A) tail length regulation in plants, we first extracted the total RNA of seven  
80 different tissues (seedling, root, shoot, leaf, inflorescence, seed, pollen) of Arabidopsis, as well as  
81 the shoot tissues of three important crops: maize, rice, soybean, with two biological replicates for  
82 each sample (Fig. 1d). We constructed 20 FLEP-seq2 libraries, each sequenced with a MinION  
83 flow cell, which in total yielded ~276 million raw reads and ~121 million poly(A)+ reads (Fig. 1d,  
84 Table S1). The median poly(A) length of gene is mainly between 50 nt and 100 nt (Table S2),  
85 while the poly(A) length distribution of all reads has two prominent peaks, one at ~20 nt and the

86 other at ~45 nt (Fig. 1 d, Fig. 1e). A peak in ~70 nt can also be observed in some samples, such as  
87 soybean and maize (Fig. 1e). These peaks are typically phased with an interval of 25 to 30 nt (Fig.  
88 1e), consistent with the footprint of one PABPC protein<sup>2,6,27-29</sup>, suggesting a large portion of  
89 mRNAs are protected by PABPC in plants.

90

91 To investigate if the differences in poly(A) tail length among different genes originated from the  
92 nascent RNA, we also analyzed the poly(A) tail length of nascent RNA in the nuclei from  
93 Arabidopsis, rice, soybean and maize (Table S3). To our surprise, the poly(A) tail lengths of the  
94 nuclear RNA are much longer, mainly at 100–200 nt, with the median length of nuclear RNAs are  
95 almost twice the size as to those of total RNAs (Fig. S3), and the median poly(A) tail lengths of  
96 genes are also considerably longer than those in total RNAs (Fig. 2a). We previously reported that  
97 a large portion of plant nascent transcripts are fully transcribed, polyadenylated, yet incompletely  
98 spliced, and these intron-containing nascent RNAs are presumably tethered to the chromatin until  
99 they complete splicing<sup>5</sup>. Based on this model, the transcripts with introns detected in total RNAs  
100 are mostly the incompletely spliced RNAs in the nuclear. Indeed, we observed that the intron-  
101 containing transcripts in total RNA have longer poly(A) tails than the fully spliced ones (Fig. 2b,  
102 Fig. 2c, Fig. S4a), and the poly(A) tail lengths of these transcripts with introns from total RNA are  
103 similar to those from nuclear RNA (Fig. 2b, Fig. 2d, Fig. S4b). Interestingly, in the nuclei, poly(A)  
104 tail lengths of the intron-containing transcripts and fully-spliced transcripts are largely the same  
105 (Fig. 2b), suggesting shortening of poly(A) tail is a rapid process that occurs after splicing is  
106 completed and before the transported mRNA is established in the cytoplasm.

107

108 In addition, we found that the poly(A) tail length of about 1/5 of alternatively spliced isoforms  
109 (exclude intron retention) are significantly longer than those of the corresponding major isoforms  
110 (the most expressed isoforms) in all detected four species (Fig. 2e). Using public Arabidopsis RNA  
111 seq data<sup>30</sup>, we found that most of these isoforms, e.g., an alternative 3' splicing site event  
112 generating isoform in AT3G01480 (Fig. S5), are upregulated in *up frameshift 1 (upf1) upf3* mutant  
113 (Fig. 2f), which disrupts the cytoplasmic nonsense-mediated decay (NMD) pathway. This  
114 suggested that most of them are the targets of the NMD pathway. NMD is a cytoplasmic mRNA  
115 surveillance mechanism which primarily recognizes target RNA during the first round of  
116 translation and mediates rapid degradation of their targets<sup>31,32</sup>. Based on this model, for these  
117 NMD-targeted isoforms, the detected transcripts/reads should mainly be newly synthesized RNAs  
118 which are still in the nucleus and haven't undergone the first round of translation. Consistent with  
119 this, these isoforms are enriched in nuclear (Fig. S6), and their poly(A) tail lengths are consistent  
120 with those of the transcripts with introns (Fig. S7). All these results indicated that nuclear nascent  
121 RNA has a long poly(A) tail and a global deadenylation of mature mRNAs occurs in the cytoplasm  
122 of plant cells.

123  
124 Transcripts from different genes have poly(A) tails of distinct lengths (Fig. 1d, right panel).  
125 However, the poly(A) tails of nuclear nascent RNAs are generally different from those of total  
126 RNAs (Fig. 2b), indicating that these intergenic length differences of poly(A) tail in steady-state  
127 transcripts should be largely determined by the cytoplasmic deadenylation step. Using the reported  
128 genome-wide dataset of mRNA half-lives in Arabidopsis<sup>33</sup>, we found that the poly(A) tails of the  
129 most unstable transcripts, i.e., the transcripts from genes with shortest mRNA half-lives, are  
130 mainly 70–150 nt, similar to or slightly shorter than those of nuclear RNAs (Fig. 2g, 2h). For these

131 genes, a large number of transcripts with short poly(A) tails in 10–20 nt are also detected, while  
132 the transcripts with poly(A) tails in 20–70 nt are few, implying that they undergo a rapid  
133 deadenylation step that shortens the poly(A) in the cytoplasm. On the contrary, the poly(A) tail  
134 lengths of the stable transcripts, especially for the most stable transcripts, are distinctly shorter  
135 than those of nuclear nascent RNAs, and usually enriched in the range of 20 to 80 nt with phased  
136 peaks presumably due to PABPC-binding (Fig. 2g, 2h). These results suggest stable mRNAs  
137 initially undergo cytoplasmic deadenylation but are subsequently protected by PABPs against  
138 further deadenylation and decay. These results indicated the different poly(A) tail lengths that we  
139 observed for different genes could be partly explained by the regulation of differential  
140 deadenylation.

141  
142 Next, we investigated whether there is tissue-specific regulation of poly(A) tail length. Although  
143 the poly(A) tail length distributions are similar among most tissues, the pattern in pollen and seed  
144 are distinct (Fig. 1d, Fig. 3a). The poly(A) tails of transcripts in pollen and seed, especially in  
145 pollen, are mainly composed of medium size, with few shortest and longest poly(A) tails (Fig. 1d,  
146 Fig. 3a), which is reminiscent of the feature of stable transcripts in other tissues (Fig. 2g). The  
147 poly(A) tail distribution of pollen RNAs has three peaks with a ~26 nt phase interval (Fig. 1e).  
148 Moreover, different from other tissues in which the poly(A) tails are enriched at 20–30 nt and 40–  
149 60 nt, the poly(A) tails of pollen are mainly at 40–60 nt and 70–90 nt (Fig. 1d, Fig. 3a), suggesting  
150 that the transcripts in pollen are potentially bound and protected by more PABPs. The poly(A) tails  
151 of mRNAs with short half-lives in seedling also enriched at 40–90 nt and has two peaks at 40–60  
152 nt and 70–90 nt in pollen (Fig. S8a, S8b), implying that many transcripts which are rapidly  
153 degraded in other tissues are also protected in pollen. Similar to pollen, poly(A) tail distribution in

154 seed also exhibits longer tails, although the pattern is less obvious than in pollen (Fig. 1d, Fig. 1e,  
155 Fig. 3a). These results indicated a stronger protection by PABPs in pollen and seed, consistent  
156 with the previous reports that the mRNAs in pollen are usually stable<sup>34</sup> and many mRNAs are  
157 stored in pollen and seed for the germination of pollen and seed, respectively<sup>35,36</sup>.

158

159 Besides pollen and seed which are distinctly different from other tissues in poly(A) tail length  
160 distribution, the correlation coefficients of the median poly(A) tails of genes among the other five  
161 tissues are also lower than the correlation coefficients between two biological replicates from the  
162 same tissue (Fig. S9a). The heatmap plot of the median poly(A) tail length of genes also showed  
163 similar results (Fig. S9b). These results suggested that the poly(A) tails of many genes are tissue-  
164 specifically regulated. Consistent with this finding, a large number of genes (range between 250  
165 and 1665) showing significantly differentially regulated poly(A) tails were identified in each pair  
166 of tissues, compared to only few (8 to 57) differential genes identified from the random data  
167 generated by shuffling the samples of two compared tissues (Fig. S9c). For example, the poly(A)  
168 tails of AT5G16470.1, AT1G51200.1, AT5G65480.1 are enriched in 10–50 nt length in most  
169 tissues, and the poly(A) tail of AT2G01100.1 are enriched in 100–200 nt length, but all of them  
170 are enriched in 50–100 nt length in pollen (Fig. 3b). The poly(A) tail of AT1G08830.1 and  
171 AT1G09070.1 are differentially shorter in leaf and inflorescence than those in seedling, shoot and  
172 root (Fig. 3b). And the poly(A) tails of AT3G57450.1 are shorter in leaf than those in seedling,  
173 shoot, root and inflorescence (Fig. 3b).

174

175 The poly(A) length distributions of different species are quite similar, but also show some  
176 differences (Fig. 1d, Fig. 3c). Compared to Arabidopsis shoot, rice shoot has more transcripts with



177 an extremely short tail (Fig. 1d), and more genes have a peak at 10–20 nt in poly(A) distribution  
178 (Fig. 3c), and thus the median poly(A) tail lengths of genes are shorter (Fig. 1d). In contrast, maize  
179 and soybean shoot, especially for soybean shoot, has fewer transcripts with an extremely shorter  
180 tail, but has more transcripts with a longer tail (Fig. 1d, Fig. 3c), and showed a higher peak in 60–  
181 80 nt (Fig. 1d, Fig. 1e), which might represent transcripts protected by three PABPs. Despite these  
182 differences, the poly(A) tail lengths of homologous genes are significantly correlated among  
183 different species ( $r$ : 0.49 to 0.58) (Fig. 3d). Take transcription factors as examples, the poly(A)  
184 tails of *SQUAMOSA PROMOTER BINDING PROTEIN-LIKE 1* (*SPL1*) and *SPL12*, which act  
185 redundantly in thermotolerance at the reproductive stage<sup>37</sup>, has a broader distribution in length;  
186 *ETHYLENE INSENSITIVE 3* and its closest homolog *EIN3-LIKE1* (*EIL1*), two key regulators in  
187 ethylene signal transduction pathway, have more poly(A) tails in 20–100 nt; the poly(A) tails of  
188 *METHYLENE BLUE SENSITIVITY 2* (*MBS2*), a mediator of singlet oxygen responses<sup>38</sup>, enriched  
189 at 20–50 nt; the poly(A) tails of *ETHYLENE RESPONSE FACTOR 4* (*ERF4*) / *ERF8* / *ERF9* have  
190 two peaks in length, one at 50–100 nt and the other at 10–20 nt; and the poly(A) tails of *AUXIN*  
191 *RESPONSE FACTOR 10* (*ARF10*) / *ARF16* are mainly higher than 100–nt (Fig. 3e). These results  
192 suggested that the poly(A) tail lengths of orthologous genes are relatively conserved among  
193 different plant species, and thus might be selected under evolutionary pressure.

194

195 Our data showed that the poly(A) tail lengths can be different among different genes but highly  
196 correlated among different tissues for the same gene (Fig. S9a,  $r \geq 0.8$  for most tissue pairs  
197 except for pollen and seed), and are evolutionarily conserved in different species. These results  
198 indicate that they are tightly controlled in gene-specific ways in plants, thus may reflect their  
199 critical roles in gene regulation. The poly(A) tails of total RNA are significantly shorter than those

200 of nuclear RNA, indicating that the poly(A) lengths of steady-state mRNA are largely dependent  
201 on the cytoplasmic deadenylation process. If deadenylation rate is uniform for a given gene, the  
202 poly(A) tail length distribution should be broad and flat, such as the pattern of *SPL1/SPL12* genes  
203 shown in Fig. 3e. However, the poly(A) tail of many plant transcripts, especially for stable RNAs,  
204 have peaks at 20–60 nt, indicating that they first undergo rapid deadenylation and then be protected  
205 when poly(A) tails become 20–60 nt. This is consistent with the dual roles of PABPC and the  
206 biphasic deadenylation model reported in animals and yeast — PABPC can stimulate the  
207 deadenylation of long poly(A) tails via binding to the deadenylase complexes but blocking  
208 precocious decay<sup>1,2,27,28</sup>. However, the homologs of the executor which initially trim the long  
209 poly(A) tails of nascent RNA in this model, PAN2/PAN3<sup>2,27</sup>, although conserved in animals and  
210 yeast, haven't been identified in the Arabidopsis genome<sup>39</sup>, implying other deadenylase complexes  
211 may replace them to perform the initial trimming. Besides, the poly(A) tail of some transcripts,  
212 especially for those with short half-lives, are longer and rarely in 20–60 nt, but usually are also  
213 enriched in 10–20 nt (Fig 2g, 3a, 3c), a size that may be short enough to loosen or lost their  
214 association with PABP and has been reported to prefer for being uridylated and decay<sup>24,28,40</sup>,  
215 implying an accelerated deadenylation from long poly(A) tail to extremely short, consistent with  
216 the canonical mRNA decay model that the poly(A) tail is first shortened to 10–12 nt before further  
217 decay from both 5'-3' and 3'-5' direction<sup>2</sup>. These results suggested that there could be multiple  
218 modes of deadenylation in plants, which are gene-specifically regulated, highlighting the  
219 importance of profiling poly(A) lengths of different genes.

220

221 It has been reported that the poly(A) tail lengths are globally changed in specific animal systems,  
222 such as the oocyte-to-embryo development stage, a model system to study the function of poly(A)

223 tail<sup>1,2,13,16</sup>. Here, our data highlights that pollen and seed show distinct poly(A) tail length  
224 distribution among plant tissues. The poly(A) tails of pollen and seed RNAs are enriched in 40–  
225 90 nt, thus might be protected by more PABPC proteins and serve the purpose of storing mRNA  
226 in these two tissues<sup>34-36</sup>. Arabidopsis genome contains eight PABPC genes<sup>8,41</sup>. Previous reports<sup>8,41</sup>  
227 and the public RNA-seq dataset<sup>42</sup> reveal that *PAB2* and its two closest homologs, *PAB4* and *PAB8*,  
228 are highly expressed in a wide range of tissues, while *PAB3*, *PAB5*, *PAB6* and *PAB7* are expressed  
229 in pollen (Fig. S10). Further study on these pollen-specifically expressed PABs will help explore  
230 the unique mechanism of poly(A) length regulation in pollen and its roles in stabilizing mRNA.  
231 Finally, the comprehensive landscape of poly(A) tails from various tissues and species will provide  
232 an important resource to explore the dynamic regulation of poly(A) length and its roles in  
233 controlling gene expression in plants.

234

## 235 **Methods**

### 236 *Plant materials and RNA isolation*

237 Arabidopsis ecotype Col-0, soybean cultivar Wm82, rice cultivar Nipponbare and maize cultivar  
238 B73 are used in this study. For Arabidopsis, plants were grown at 22°C with 16 h of light per 24  
239 hours. Arabidopsis seedlings, shoots and roots were harvested after growing on 1/2 MS plates for  
240 12 days. Arabidopsis leaves were harvested after growing in soil for 30 days, and Arabidopsis  
241 inflorescences were harvested after flowering. For rice, soybean and maize, plants were grown at  
242 28°C with 16 hours of light per 24 hours, and 14-day-old shoots were harvested. The nuclear  
243 fractions were separated as described<sup>4,5</sup>, and the total RNA and nuclear RNA were extracted using  
244 RNAPrep Pure Plant Plus Kit (Polysaccharides & Polyphenolics-rich, TIANGEN, DP441)  
245 according to the manufacturer's instructions.

246

### 247 *Library preparation and Nanopore sequencing*

248 FLEP-seq2 libraries were prepared from 500–3000 ng input RNA as previously described<sup>4,5</sup> with  
249 some improvement. In brief, the ribosomal RNA (rRNA) was removed using pan-plant riboPOOLS  
250 probes (siTOOLS Biotech) and Dynabeads Myone Streptavidin C1 (Thermo Fisher, #65001)  
251 according to the manufacturer's instruction (siTOOLS Biotech, two-step depletion method).  
252 rRNA-depleted RNA was purified by RNA Clean & Concentrator-5 kit (ZYMO, R1013) and then  
253 ligated to 50 pmol 3' adapter (5' -rAppCTGTAGGCACCATCAAT - NH<sub>2</sub>-3' ) in a 20 µl  
254 reaction containing 1X T4 RNA Ligase Reaction Buffer, 25% PEG8000, 40U Murine RNase  
255 Inhibitor (Vazyme, R301-03) and 20U T4 RNA Ligase 2, truncated K227Q (NEB, M0242) for 10  
256 h at 16°C. The product was cleaned up using RNA Clean & Concentrator-5 kit (ZYMO, R1013)  
257 and added into 20 µl of reverse transcription and strand-switching reaction containing 100 nM

258 custom primer (5' - phos/ ACTTGCCTGTCGCTCTATCTTCATTGATGGTGCCTACAG - 3'),  
259 500  $\mu$ M dNTPs, 1X RT Buffer, 40U Murine RNase Inhibitor (Vazyme, R301-03), 1  $\mu$ M Strand-  
260 Switching Primer (Nanopore, SQK-PCS109) and 200U Maxima H Minus Reverse Transcriptase  
261 (Thermo Fisher, EP0752), and then incubated at 90 min 42°C; 10 cycles of (2 min at 50°C; 2 min  
262 at 42°C); and 5 min at 85°C, in a thermal cycler. cDNA libraries were amplified with PrimeSTAR  
263 GXL DNA polymerase (TaKaRa, R050A) for 10-16 cycles. To minimize PCR bias, PCR cycle  
264 number optimization was performed as previously described<sup>4,5</sup>. After PCR, 1  $\mu$ l of Exonuclease I  
265 (NEB, M0293) was added to the reaction mixture and incubated the reaction at 37°C for 15 min,  
266 followed by 80°C for 15 minutes. The products were cleaned up with 0.8X Ampure XP beads  
267 (Beckman, A63880). For the Nanopore sequencing, 100 fmol amplified cDNA was loaded onto  
268 an R9.4 Flow Cell (Oxford Nanopore Technologies) using Sequence-specific cDNA-PCR  
269 Sequencing kit (Nanopore, SQK-PCS109) and sequenced on a MinION device for ~48 hours.

270

### 271 *Nanopore data processing*

272 The Nanopore data pre-processing was performed using FLEP-seq pipeline  
273 (<https://github.com/ZhaiLab-SUSTech/FLEPSeq>) as previously described with minor  
274 modification about adapter sequence<sup>4,5</sup>. Briefly, the raw Nanopore signals were converted to base  
275 sequences by Guppy (v4.0.11, download from Oxford Nanopore Community) with the default  
276 parameters (--c dna\_r9.4.1\_450bps\_hac.cfg). The reads with a mean quality score of more than 7  
277 were mapped to genome sequence using Minimap2 (v.2.17-r943-dirty)<sup>43</sup> with the following  
278 parameters: -ax splice --secondary=no -G 12000. The used genome and annotation versions of  
279 Arabidopsis, soybean, rice, maize were ARAPROT11 (<https://www.arabidopsis.org/>),  
280 Wm82.gnm4.ann1.T8TQ (<https://soybase.org/>), MSU7 (<http://rice.uga.edu>), B73 RefGen\_v5

281 (<https://maizegdb.org>), respectively. The reads mapped to rDNA, mitochondria and chloroplast  
282 genomes were removed by filter\_rRNA\_bam.py in FLEP-seq pipeline. The 3' adapters were  
283 identified by adapterFinder.py with parameter: --mode 1. The 5' and 3' adapter sequences of  
284 FLEP-seq2 are different from those of FLEP-seq, and are TTTCTGTTGGTGCTGATATTGCT  
285 and ACTTGCCTGTCGCTCTATCTTCATTGATGGTGCCTACAG, respectively. This  
286 modification has been integrated into the new version of adapterFinder.py (set '--mode 1'  
287 parameter for FLEP-seq2, and '--mode 0' or default for FLEP-seq) in FLEP-seq pipeline. Then,  
288 poly(A) tail identification and length estimation were performed by PolyACaller.py and the  
289 splicing status of intron was extracted by extract\_read\_info.py. The transcripts/reads with a  
290 predicated poly(A) tail score equal to or more than 10 were identified as polyadenylated transcripts  
291 and used for further analysis. Only the reads spanning all introns were used for the analysis of the  
292 fully-spliced and intron-containing transcripts, and the intron with a mapping ratio of at least 80%  
293 in a read was identified as unspliced intron. To identify orthologs among different species, the  
294 protein sequences of all four species were exported to OrthoFinder software<sup>44</sup> with default  
295 parameters.

296

### 297 ***Identification of alternative splicing isoform from Nanopore data***

298 We first extracted splicing junctions from reads mapped to a given gene to identify high credible  
299 splicing events. Due to the higher base error ratio, the alignment quality of nanopore reads near  
300 the splice site is relatively poor, and the end positions of splicing junctions might be wrong. Thus,  
301 if both ends of multiple detected splicing junctions are close (within 10 nt), they might be generated  
302 from wrong alignments, and only the splicing junction with the most supported reads was remained.  
303 The set of overlapping splicing junctions represents a group of alternative splicing (AS) events.

304 For a given splicing junction ( $J$ ), the percent spliced in (PSI) value of  $J$  equal to  $n1/[n1+n2]$ ;  $n1$ :  
305 the number of reads specifically supported  $J$ ;  $n2$ : the number of reads specifically supported the  
306 splicing junctions overlapping with  $J$ . The splicing junction with less than 20 supported reads or  
307 with a PSI value lower than 2% were removed. Multiple introns of one gene might undergo AS,  
308 and thus one gene could contain multiple AS groups. Therefore, we second joined these AS  
309 junctions to AS isoforms based on the supporting reads. For a given gene, the reads spanning all  
310 AS groups were extracted. The splicing statuses of all AS junctions in each read were extracted,  
311 and the intron-containing transcripts/reads were removed. Each remained read was explicitly  
312 derived from one kind of isoform, and all supported AS junction combinations/isoforms as well as  
313 the number of supported reads were calculated. The isoforms with more than 20 supported reads  
314 were identified as highly creditable isoforms, and the poly(A) tails of the reads specifically  
315 supporting them were used for the poly(A) tail length analysis of isoforms

316

### 317 ***Isoform quantification***

318 For a given gene, unique representative splicing junction of each isoform was extracted.  
319 Considering that the sequencing depth of the 3' end of a gene is usually higher, if one isoform  
320 contains two or more unique representative splicing junctions, only the most downstream one was  
321 used. For each sample, the number of reads supported the unique representative splicing junction  
322 of each isoform ( $n_j$ ) was extracted, and the minor/major isoform ratio was calculated by

323  $n_{j\_minor}/n_{j\_major}$ .

324

### 325 ***Identification of genes showing differential poly(A) tail length***

326 For comparison of two groups (e.g., tissue S and tissue R, or major isoforms S and minor isoforms  
327 R) with biological replicates (e.g., S1, S2, R1 and R2), for each gene, the poly(A) tail lengths of  
328 gene-derived reads detected in each sample ( $X_{S1}, X_{S2}, X_{R1}, X_{R2}$ ) were extracted, and the medians of  
329 poly(A) tail lengths of each sample ( $M_{S1}, M_{S2}, M_{R1}, M_{R2}$ ) were calculated. The difference factor  
330 of median ( $dm$ ) was calculated by  $dm = \max(\min(0, dm1), \min(0, dm2))$ ;  $dm1 = \min(M_{S1}, M_{S2}) -$   
331  $\max(M_{R1}, M_{R2})$ ;  $dm2 = \min(M_{R1}, M_{R2}) - \max(M_{S1}, M_{S2})$ .  $X_{S1}$  and  $X_{S2}$  were merged to  $X_S$ , and  $X_{R1}$   
332 and  $X_{R2}$  were merged to  $X_R$ . Then, for each gene, a two-sided Mann-Whitney U test between  $X_S$   
333 and  $X_R$  was performed, and the p-values of all genes were adjusted by Benjamini/Hochberg FDR  
334 (False Discovery Rate) method. The genes with an adjusted p-value less than 0.05 and a value  $dm$   
335 more than 20 were identified as the genes showing differential poly(A) tail length between samples.

336

### 337 ***Data Availability***

338 The raw sequencing data generated in this study were deposited in China National Center for  
339 Bioinformatics with accession PRJCA007575 and in NCBI with accession PRJNA788163  
340 (<https://dataview.ncbi.nlm.nih.gov/object/PRJNA788163?reviewer=hlvulfu2lo8062gc5fhuuiupf6>  
341 for reviewer link). The poly(A) tail lengths of reads from each gene in each library were recorded  
342 in China National Center for Bioinformatics with accession OMIX881. The median poly(A)  
343 lengths of genes in each library were recorded in [Table S2](#).

344

345 **Correspondence and requests for materials** should be addressed to Jixian Zhai  
346 (zhaijx@sustech.edu.cn).

347

### 348 **Acknowledgments**



349 The group of J.Z. is supported by the National Key R&D Program of China Grant  
350 (2019YFA0903903); the Program for Guangdong Introducing Innovative and Entrepreneurial  
351 Teams (2016ZT06S172); the Shenzhen Sci-Tech Fund (KYTDPT20181011104005); the Key  
352 Laboratory of Molecular Design for Plant Cell Factory of Guangdong Higher Education Institutes  
353 (2019KSYS006); and the Stable Support Plan Program of Shenzhen Natural Science Fund Grant  
354 (20200925153345004). J.J. is supported by the National Natural Science Foundation of China  
355 (32100444); and the Shenzhen Fundamental Research Program (20210317103146009).

356

### 357 **Author Contributions**

358 J.Z., J.J. and W.L. designed the experiments. W.L., J.J., B.L., X.J., Y.S. and Y.L. performed the  
359 experiments. J.J., W.L. and Y.Y. analyzed the data. J.Z. oversaw the study. J.J., W.L. and J.Z.  
360 wrote the manuscript, and all authors revised the manuscript.

361

### 362 **Competing interests**

363 The authors declare no competing interests.

## 364 **Figure Legends**

365 **Figure 1. An atlas of plant poly(A)-tail lengths measured by FLEP-seq2.** **a**, The schematic  
366 diagram of FLEP-seq2 and Direct RNA sequencing (DRS). RT: reverse transcription. **b**, The  
367 distribution of global poly(A) tail lengths of transcripts/reads (upper panel, 1 nt bin) and the median  
368 poly(A) tail length of genes (bottom panel, 5 nt bin, only genes with at least 20 reads were used)  
369 measured by FLEP-seq and DRS. **c**, An example of reads aligned to the AT1G08830 gene in a  
370 FLEP-seq2 library (seedling replicate 1). Only polyadenylated reads were shown. **d**, The  
371 distribution of global poly(A) tail lengths of transcripts/reads (left panel) and the median poly(A)  
372 tail length of genes (right panel) in different tissues and different species. In the analysis of median  
373 poly(A) tail length of genes, only genes with at least 20 reads were used. Rep #1: biological  
374 replicate 1; rep #2: biological replicate 2. **e**, The peaks of global poly(A) tail length distribution in  
375 representative samples.

376

377 **Figure 2. Nuclear Poly(A) tails are longer than tails in cytoplasm.** **a**, The distribution of median  
378 poly(A) tail lengths of nuclear and total RNA from different plant species (5 nt bin). Only genes  
379 with at least 20 detected reads in both nuclear and total RNA libraries were used. **b**, The  
380 distribution of median poly(A) tail lengths of fully spliced transcripts and intron-containing  
381 transcripts (with introns) from nuclear and total RNA in different plant species (5 nt bin). Only  
382 genes with at least 20 fully spliced reads and 20 intron-containing reads in both nuclear and total  
383 RNA libraries were used. **c**, The comparison of median poly(A) tail lengths between fully spliced  
384 transcripts and intron-containing (with introns) transcripts in Arabidopsis seedling samples. Only  
385 the transcripts/reads spanning all annotated introns were used, and only genes with at least 20 fully  
386 spliced reads and 20 intron-containing reads are used. **d**, The comparison of median poly(A) tail

387 lengths of intron-containing transcripts between nuclear and total RNA in Arabidopsis seedling.  
388 Only the transcripts/reads spanning all annotated introns were used, and only genes with at least  
389 20 intron-containing transcripts in both nuclear and total RNA libraries were used. **e**, The  
390 comparison of median poly(A) tail lengths between minor and major alternative-splicing (exclude  
391 intron-retention) generating isoforms. Only isoforms with at least 20 reads were used. For each  
392 gene, the isoform with the highest expression was designed as major isoforms. All other isoforms  
393 were designed as minor isoforms and were compared to the major isoform. The numbers of  
394 isoforms showing no differential, longer, and shorter poly(A) tails were separated with ":" and  
395 labeled above each figure. **f**, Boxplot showing the distribution of  $\Delta$  minor isoform ratio  
396 (minor/[minor+major]) of mutants. The sum of the number of minor and major isoform reads in  
397 each sample is required to be more than 10. **g**, Heatmap plot showing the poly(A) tail length  
398 distribution of genes with different half-lives. The mRNA half-life data of seedling was reported  
399 in previous paper (Szabo et al., 2020). Each row in the plot represents the poly(A) tail length  
400 distribution of one gene. Only genes with at least 50 reads were used. **h**, The bulk poly(A) tail  
401 length distribution of genes with different mRNA half-lives in Arabidopsis. N: gene number.

402

403 **Figure 3. Tissue-specific and evolutionarily-conserved regulation of poly(A) tail length in**  
404 **plants. a**, Heatmap plot showing the poly(A) tail length distribution of genes in different tissues.  
405 Only genes with at least 50 reads were used. **b**, Examples of genes showing differential poly(A)  
406 tail length distribution in different tissues. Inflo.: Inflorescence. r1: biological replicate 1; r2:  
407 biological replicate 2. **c**, Heatmap plot showing the poly(A) tail length distribution of genes in  
408 different species. Only genes with at least 50 reads were used. **d**, The correlation of the median  
409 poly(A) tail length of orthologous gene pair in different species. Only genes with more than 50

410 reads were used. The Pearson's  $r$  values were labeled above each figure. **e**, Examples of the poly(A)  
411 tail length distributions of homologous genes among different species. N: gene number.  
412

## 413 **References**

- 414 1 Nicholson, A. L. & Pasquinelli, A. E. Tales of Detailed Poly(A) Tails. *Trends Cell Biol.*  
415 **29**, 191-200, doi:10.1016/j.tcb.2018.11.002 (2019).
- 416 2 Passmore, L. A. & Coller, J. Roles of mRNA poly(A) tails in regulation of eukaryotic gene  
417 expression. *Nat. Rev. Mol. Cell Biol.*, doi:10.1038/s41580-021-00417-y (2021).
- 418 3 Eckmann, C. R., Rammelt, C. & Wahle, E. Control of poly(A) tail length. *Wiley Interdiscip.*  
419 *Rev. RNA* **2**, 348-361, doi:10.1002/wrna.56 (2011).
- 420 4 Long, Y., Jia, J., Mo, W., Jin, X. & Zhai, J. FLEP-seq: simultaneous detection of RNA  
421 polymerase II position, splicing status, polyadenylation site and poly(A) tail length at  
422 genome-wide scale by single-molecule nascent RNA sequencing *Nat. Protoc.* **16**, 4355-  
423 4381, doi:10.1038/s41596-021-00581-7 (2021).
- 424 5 Jia, J. *et al.* Post-transcriptional splicing of nascent RNA contributes to widespread intron  
425 retention in plants. *Nat. Plants* **6**, 780-788 doi:10.1038/s41477-020-0688-1 (2020).
- 426 6 Lima, S. A. *et al.* Short poly(A) tails are a conserved feature of highly expressed genes.  
427 *Nat. Struct. Mol. Biol.* **24**, 1057-1063, doi:10.1038/nsmb.3499 (2017).
- 428 7 Kühn, U. & Wahle, E. Structure and function of poly(A) binding proteins. *Biochim.*  
429 *Biophys. Acta.* **1678**, 67-84, doi:10.1016/j.bbaexp.2004.03.008 (2004).
- 430 8 Zhao, T. *et al.* Impact of poly(A)-tail G-content on Arabidopsis PAB binding and their role  
431 in enhancing translational efficiency. *Genome Biol.* **20**, 189, doi:10.1186/s13059-019-  
432 1799-8 (2019).
- 433 9 Goldstrohm, A. C. & Wickens, M. Multifunctional deadenylase complexes diversify  
434 mRNA control. *Nat. Rev. Mol. Cell Biol.* **9**, 337-344, doi:10.1038/nrm2370 (2008).
- 435 10 Eisen, T. J. *et al.* The Dynamics of Cytoplasmic mRNA Metabolism. *Mol. Cell* **77**, 786-  
436 799 e710, doi:10.1016/j.molcel.2019.12.005 (2020).
- 437 11 Vi, S. L. *et al.* Target specificity among canonical nuclear poly(A) polymerases in plants  
438 modulates organ growth and pathogen response. *Proc. Natl. Acad. Sci. U S A* **110**, 13994-  
439 13999, doi:10.1073/pnas.1303967110 (2013).
- 440 12 Hunt, A. G. mRNA 3' end formation in plants: Novel connections to growth, development  
441 and environmental responses. *Wiley Interdiscip. Rev. RNA* **11**, e1575,  
442 doi:10.1002/wrna.1575 (2020).
- 443 13 Subtelny, A. O., Eichhorn, S. W., Chen, G. R., Sive, H. & Bartel, D. P. Poly(A)-tail  
444 profiling reveals an embryonic switch in translational control. *Nature* **508**, 66-71  
445 doi:10.1038/nature13007 (2014).
- 446 14 Udagawa, T. *et al.* Bidirectional control of mRNA translation and synaptic plasticity by  
447 the cytoplasmic polyadenylation complex. *Mol. Cell* **47**, 253-266,  
448 doi:10.1016/j.molcel.2012.05.016 (2012).

- 449 15 Chang, H., Lim, J., Ha, M. & Kim, V. N. TAIL-seq: Genome-wide Determination of  
450 Poly(A) Tail Length and 3' End Modifications. *Mol. Cell* **53**, 1044-1052  
451 doi:10.1016/j.molcel.2014.02.007 (2014).
- 452 16 Lim, J., Lee, M., Son, A., Chang, H. & Kim, V. N. mTAIL-seq reveals dynamic poly(A)  
453 tail regulation in oocyte-to-embryo development. *Genes Dev.* **30**, 1671-1682  
454 doi:10.1101/gad.284802.116 (2016).
- 455 17 Harrison, P. F. *et al.* PAT-seq: a method to study the integration of 3' -UTR dynamics  
456 with gene expression in the eukaryotic transcriptome. *RNA* **21**, 1502-1510,  
457 doi:10.1261/rna.048355.114 (2015).
- 458 18 Woo, Y. M. *et al.* TED-Seq Identifies the Dynamics of Poly(A) Length during ER Stress.  
459 *Cell Rep.* **24**, 3630-3641, doi:10.1016/j.celrep.2018.08.084 (2018).
- 460 19 Legnini, I., Alles, J., Karauskos, N., Ayoub, S. & Rajewsky, N. FLAM-seq: full-length  
461 mRNA sequencing reveals principles of poly(A) tail length control. *Nat. Methods* **16**, 879-  
462 886 doi:10.1038/s41592-019-0503-y (2019).
- 463 20 Liu, Y., Nie, H., Liu, H. & Lu, F. Poly(A) inclusive RNA isoform sequencing (PAIso-seq)  
464 reveals wide-spread non-adenosine residues within RNA poly(A) tails. *Nat. Commun.* **10**,  
465 5292 doi:10.1038/s41467-019-13228-9 (2019).
- 466 21 Parker, M. T. *et al.* Nanopore direct RNA sequencing maps the complexity of Arabidopsis  
467 mRNA processing and m6A modification. *eLife* **9**, e49658 doi:10.7554/eLife.49658 (2020).
- 468 22 Workman, R. E. *et al.* Nanopore native RNA sequencing of a human poly(A) transcriptome.  
469 *Nat. Methods* **16**, 1297-1305, doi:10.1038/s41592-019-0617-2 (2019).
- 470 23 Parker, M. T. *et al.* Widespread premature transcription termination of Arabidopsis thaliana  
471 NLR genes by the spen protein FPA. *Elife* **10**, doi:10.7554/eLife.65537 (2021).
- 472 24 Scheer, H. *et al.* The TUTase URT1 connects decapping activators and prevents the  
473 accumulation of excessively deadenylated mRNAs to avoid siRNA biogenesis. *Nat.*  
474 *Commun.* **12**, 1298, doi:10.1038/s41467-021-21382-2 (2021).
- 475 25 Zuber, H. *et al.* Uridylation and PABP Cooperate to Repair mRNA Deadenylated Ends in  
476 Arabidopsis. *Cell Rep.* **14**, 2707-2717, doi:10.1016/j.celrep.2016.02.060 (2016).
- 477 26 Wu, X., Wang, J., Wu, X., Hong, Y. & Li, Q. Q. Heat Shock Responsive Gene Expression  
478 Modulated by mRNA Poly(A) Tail Length. *Front. Plant Sci.* **11**,  
479 doi:10.3389/fpls.2020.01255 (2020).
- 480 27 Schafer, I. B. *et al.* Molecular Basis for poly(A) RNP Architecture and Recognition by the  
481 Pan2-Pan3 Deadenylase. *Cell* **177**, 1619-1631, doi:10.1016/j.cell.2019.04.013 (2019).
- 482 28 Yi, H. *et al.* PABP Cooperates with the CCR4-NOT Complex to Promote mRNA  
483 Deadenylation and Block Precocious Decay. *Mol. Cell* **70**, 1081-1088  
484 doi:10.1016/j.molcel.2018.05.009 (2018).
- 485 29 Webster, M. W. *et al.* mRNA Deadenylation Is Coupled to Translation Rates by the  
486 Differential Activities of Ccr4-Not Nucleases. *Mol. Cell* **70**, 1089-1100  
487 doi:10.1016/j.molcel.2018.05.033 (2018).

- 488 30 Drechsel, G. *et al.* Nonsense-mediated decay of alternative precursor mRNA splicing  
489 variants is a major determinant of the Arabidopsis steady state transcriptome. *Plant Cell*  
490 **25**, 3726-3742, doi:10.1105/tpc.113.115485 (2013).
- 491 31 Kervestin, S. & Jacobson, A. NMD: a multifaceted response to premature translational  
492 termination. *Nat. Rev. Mol. Cell Biol.* **13**, 700-712, doi:10.1038/nrm3454 (2012).
- 493 32 Kurosaki, T., Popp, M. W. & Maquat, L. E. Quality and quantity control of gene expression  
494 by nonsense-mediated mRNA decay. *Nat. Rev. Mol. Cell Biol.* **20**, 406-420,  
495 doi:10.1038/s41580-019-0126-2 (2019).
- 496 33 Szabo, E. X. *et al.* Metabolic Labeling of RNAs Uncovers Hidden Features and Dynamics  
497 of the Arabidopsis Transcriptome. *Plant Cell* **32**, 871-887 doi:10.1105/tpc.19.00214  
498 (2020).
- 499 34 Ylstra, B. & McCormick, S. Analysis of mRNA stabilities during pollen development and  
500 in BY2 cells. *Plant J.* **20**, 101-108, doi:10.1046/j.1365-313x.1999.00580.x (1999).
- 501 35 Bai, B. *et al.* Seed-Stored mRNAs that Are Specifically Associated to Monosomes Are  
502 Translationally Regulated during Germination. *Plant Physiol.* **182**, 378-392,  
503 doi:10.1104/pp.19.00644 (2020).
- 504 36 Hao, H., Li, Y., Hu, Y. & Lin, J. Inhibition of RNA and protein synthesis in pollen tube  
505 development of *Pinus bungeana* by actinomycin D and cycloheximide. *New Phytol.* **165**,  
506 721-729, doi:10.1111/j.1469-8137.2004.01290.x (2005).
- 507 37 Chao, L. M. *et al.* Arabidopsis Transcription Factors SPL1 and SPL12 Confer Plant  
508 Thermotolerance at Reproductive Stage. *Mol. Plant* **10**, 735-748,  
509 doi:10.1016/j.molp.2017.03.010 (2017).
- 510 38 Shao, N., Duan, G. Y. & Bock, R. A mediator of singlet oxygen responses in  
511 *Chlamydomonas reinhardtii* and Arabidopsis identified by a luciferase-based genetic  
512 screen in algal cells. *Plant Cell* **25**, 4209-4226, doi:10.1105/tpc.113.117390 (2013).
- 513 39 Chantarachot, T. & Bailey-Serres, J. Polysomes, Stress Granules, and Processing Bodies:  
514 A Dynamic Triumvirate Controlling Cytoplasmic mRNA Fate and Function. *Plant Physiol.*  
515 **176**, 254-269, doi:10.1104/pp.17.01468 (2018).
- 516 40 Yu, S. & Kim, V. N. A tale of non-canonical tails: gene regulation by post-transcriptional  
517 RNA tailing. *Nat. Rev. Mol. Cell Biol.* **21**, 542-556, doi:10.1038/s41580-020-0246-8  
518 (2020).
- 519 41 Belostotsky, D. A. Unexpected Complexity of Poly(A)-Binding Protein Gene Families in  
520 Flowering Plants: Three Conserved Lineages That Are at Least 200 Million Years Old and  
521 Possible Auto- and Cross-Regulation. *Genetics* **163**, 311-319,  
522 doi:10.1093/genetics/163.1.311 (2003).
- 523 42 Zhang, H. *et al.* A Comprehensive Online Database for Exploring approximately 20,000  
524 Public Arabidopsis RNA-Seq Libraries. *Mol. Plant* **13**, 1231-1233,  
525 doi:10.1016/j.molp.2020.08.001 (2020).

- 526 43 Li, H. Minimap2: pairwise alignment for nucleotide sequences. *Bioinformatics* **34**, 3094-  
527 3100, doi:10.1093/bioinformatics/bty191 (2018).
- 528 44 Emms, D. M. & Kelly, S. OrthoFinder: phylogenetic orthology inference for comparative  
529 genomics. *Genome Biol.* **20**, 238, doi:10.1186/s13059-019-1832-y (2019).
- 530



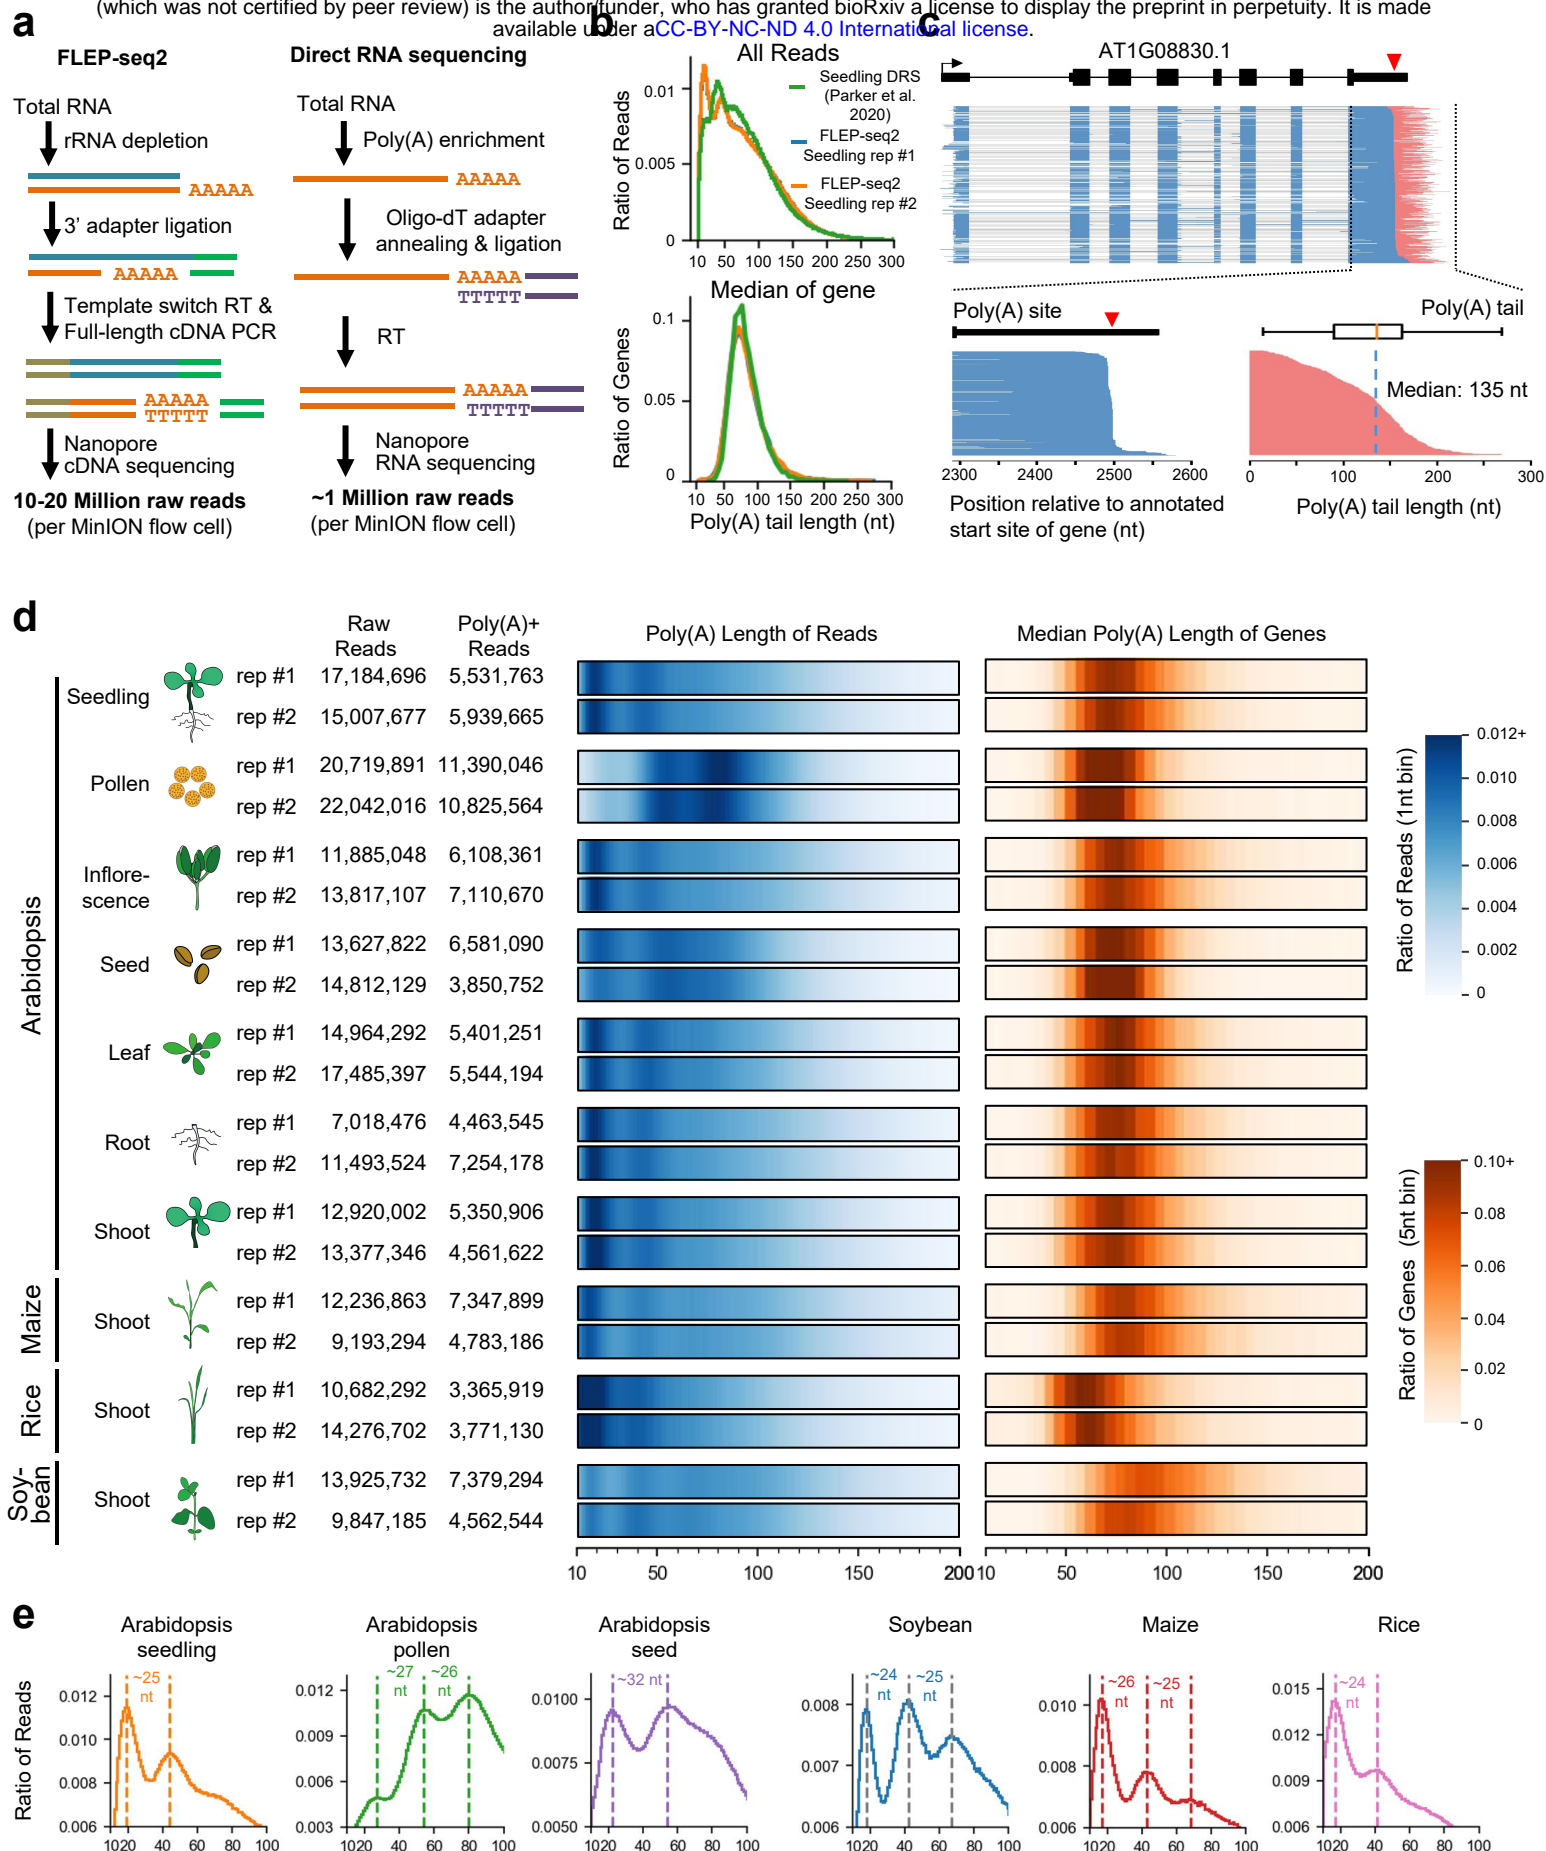

**Figure 1. An atlas of plant poly(A)-tail lengths measured by FLEP-seq2. a**, The schematic diagram of FLEP-seq2 and Direct RNA sequencing (DRS). RT: reverse transcription. **b**, The distribution of global poly(A) tail lengths of transcripts/reads (upper panel, 1 nt bin) and the median poly(A) tail length of genes (bottom panel, 5 nt bin, only genes with at least 20 reads were used) measured by FLEP-seq and DRS. **c**, An example of reads aligned to the AT1G08830 gene in a FLEP-seq2 library (seedling replicate 1). Only polyadenylated reads were shown. **d**, The distribution of global poly(A) tail lengths of transcripts/reads (left panel) and the median poly(A) tail length of genes (right panel) in different tissues and different species. In the analysis of median poly(A) tail length of genes, only genes with at least 20 reads were used. Rep #1: biological replicate 1; rep #2: biological replicate 2. **e**, The peaks of global poly(A) tail length distribution in representative samples.

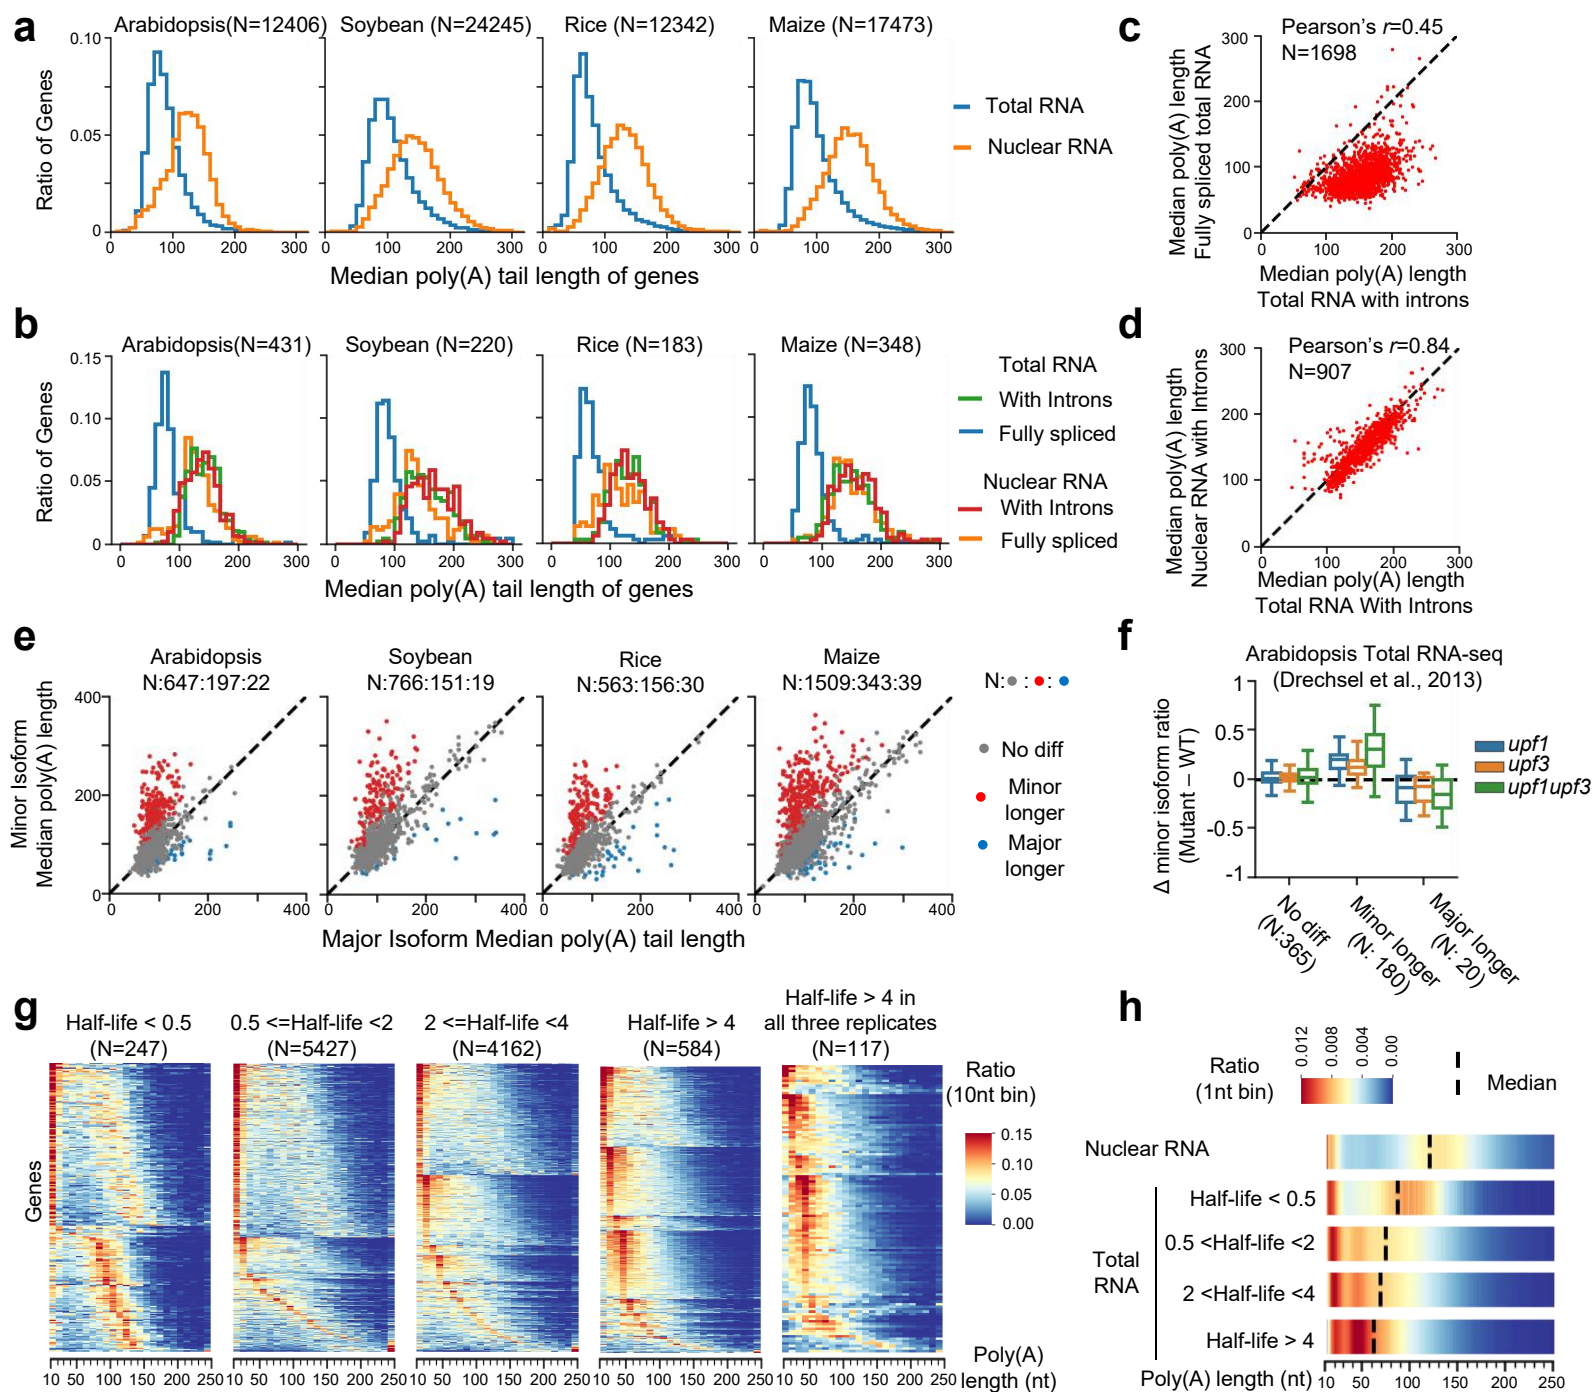

**Figure 2. Nuclear Poly(A) tails are longer than tails in cytoplasm. a**, The distribution of median poly(A) tail lengths of nuclear and total RNA from different plant species (5 nt bin). Only genes with at least 20 detected reads in both nuclear and total RNA libraries were used. **b**, The distribution of median poly(A) tail lengths of fully spliced transcripts and intron-containing transcripts (with introns) from nuclear and total RNA in different plant species (5 nt bin). Only genes with at least 20 fully spliced reads and 20 intron-containing reads in both nuclear and total RNA libraries were used. **c**, The comparison of median poly(A) tail lengths between fully spliced transcripts and intron-containing (with introns) transcripts in Arabidopsis seedling samples. Only the transcripts/reads spanning all annotated introns were used, and only genes with at least 20 fully spliced reads and 20 intron-containing reads are used. **d**, The comparison of median poly(A) tail lengths of intron-containing transcripts between nuclear and total RNA in Arabidopsis seedling. Only the transcripts/reads spanning all annotated introns were used, and only genes with at least 20 intron-containing transcripts in both nuclear and total RNA libraries were used. **e**, The comparison of median poly(A) tail lengths between minor and major alternative-splicing (exclude intron-retention) generating isoforms. Only isoforms with at least 20 reads were used. For each gene, the isoform with the highest expression was designed as major isoforms. All other isoforms were designed as minor isoforms and were compared to the major isoform. The numbers of isoforms showing no differential, longer, and shorter poly(A) tails were separated with ":" and labeled above each figure. **f**, Boxplot showing the distribution of  $\Delta$  minor isoform ratio (minor/[minor+major]) of mutants. The sum of the number of minor and major isoform reads in each sample is required to be more than 10. **g**, Heatmap plot showing the poly(A) tail length distribution of genes with different half-lives. The mRNA half-life data of seedling was reported in previous paper (Szabo et al., 2020). Each row in the plot represents the poly(A) tail length distribution of one gene. Only genes with at least 50 reads were used. **h**, The bulk poly(A) tail length distribution of genes with different mRNA half-lives in Arabidopsis. N: gene number.



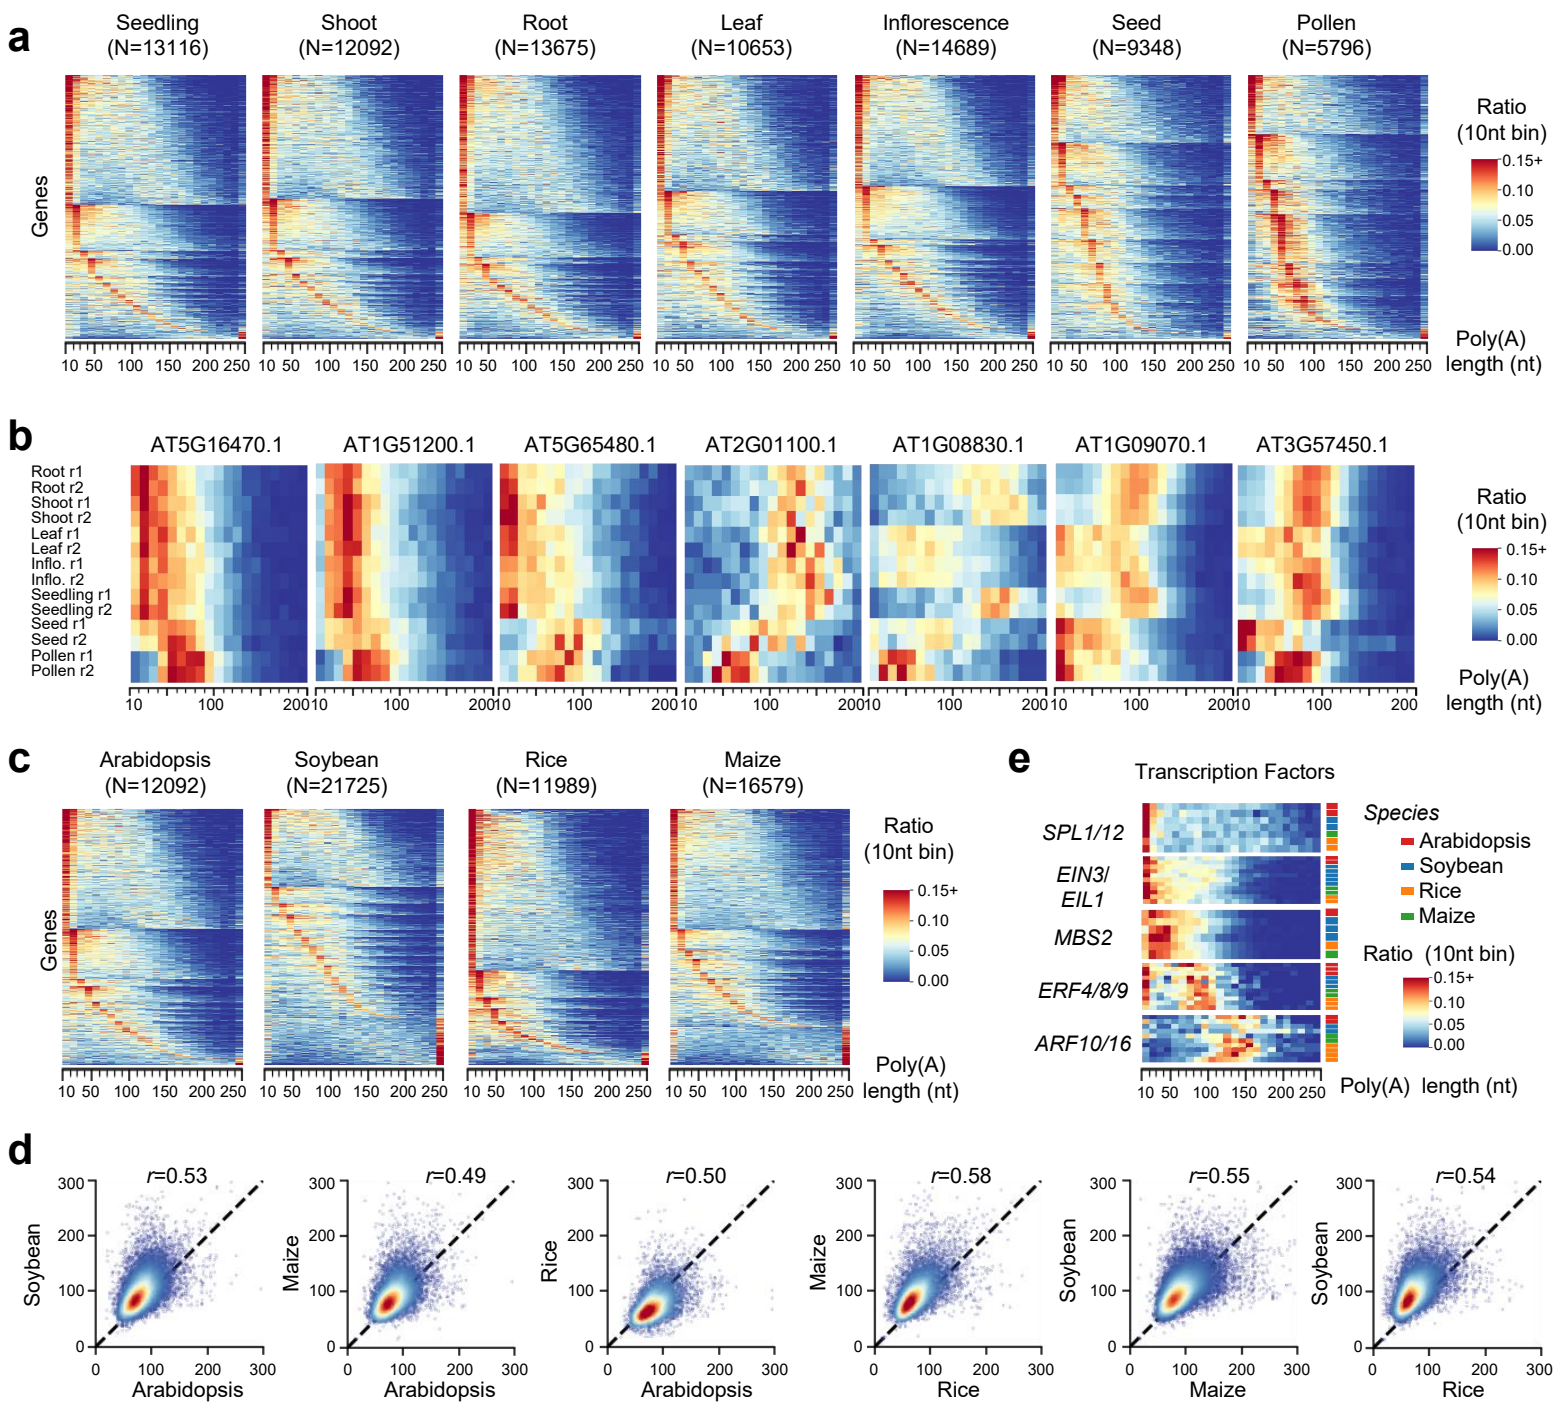

**Figure 3. Tissue-specific and evolutionarily-conserved regulation of poly(A) tail length in plants.** **a**, Heatmap plot showing the poly(A) tail length distribution of genes in different tissues. Only genes with at least 50 reads were used. **b**, Examples of genes showing differential poly(A) tail length distribution in different tissues. Infl.: Inflorescence. r1: biological replicate 1; r2: biological replicate 2. **c**, Heatmap plot showing the poly(A) tail length distribution of genes in different species. Only genes with at least 50 reads were used. **d**, The correlation of the median poly(A) tail length of orthologous gene pair in different species. Only genes with more than 50 reads were used. The Pearson's  $r$  values were labeled above each figure. **e**, Examples of the poly(A) tail length distributions of homologous genes among different species. N: gene number.

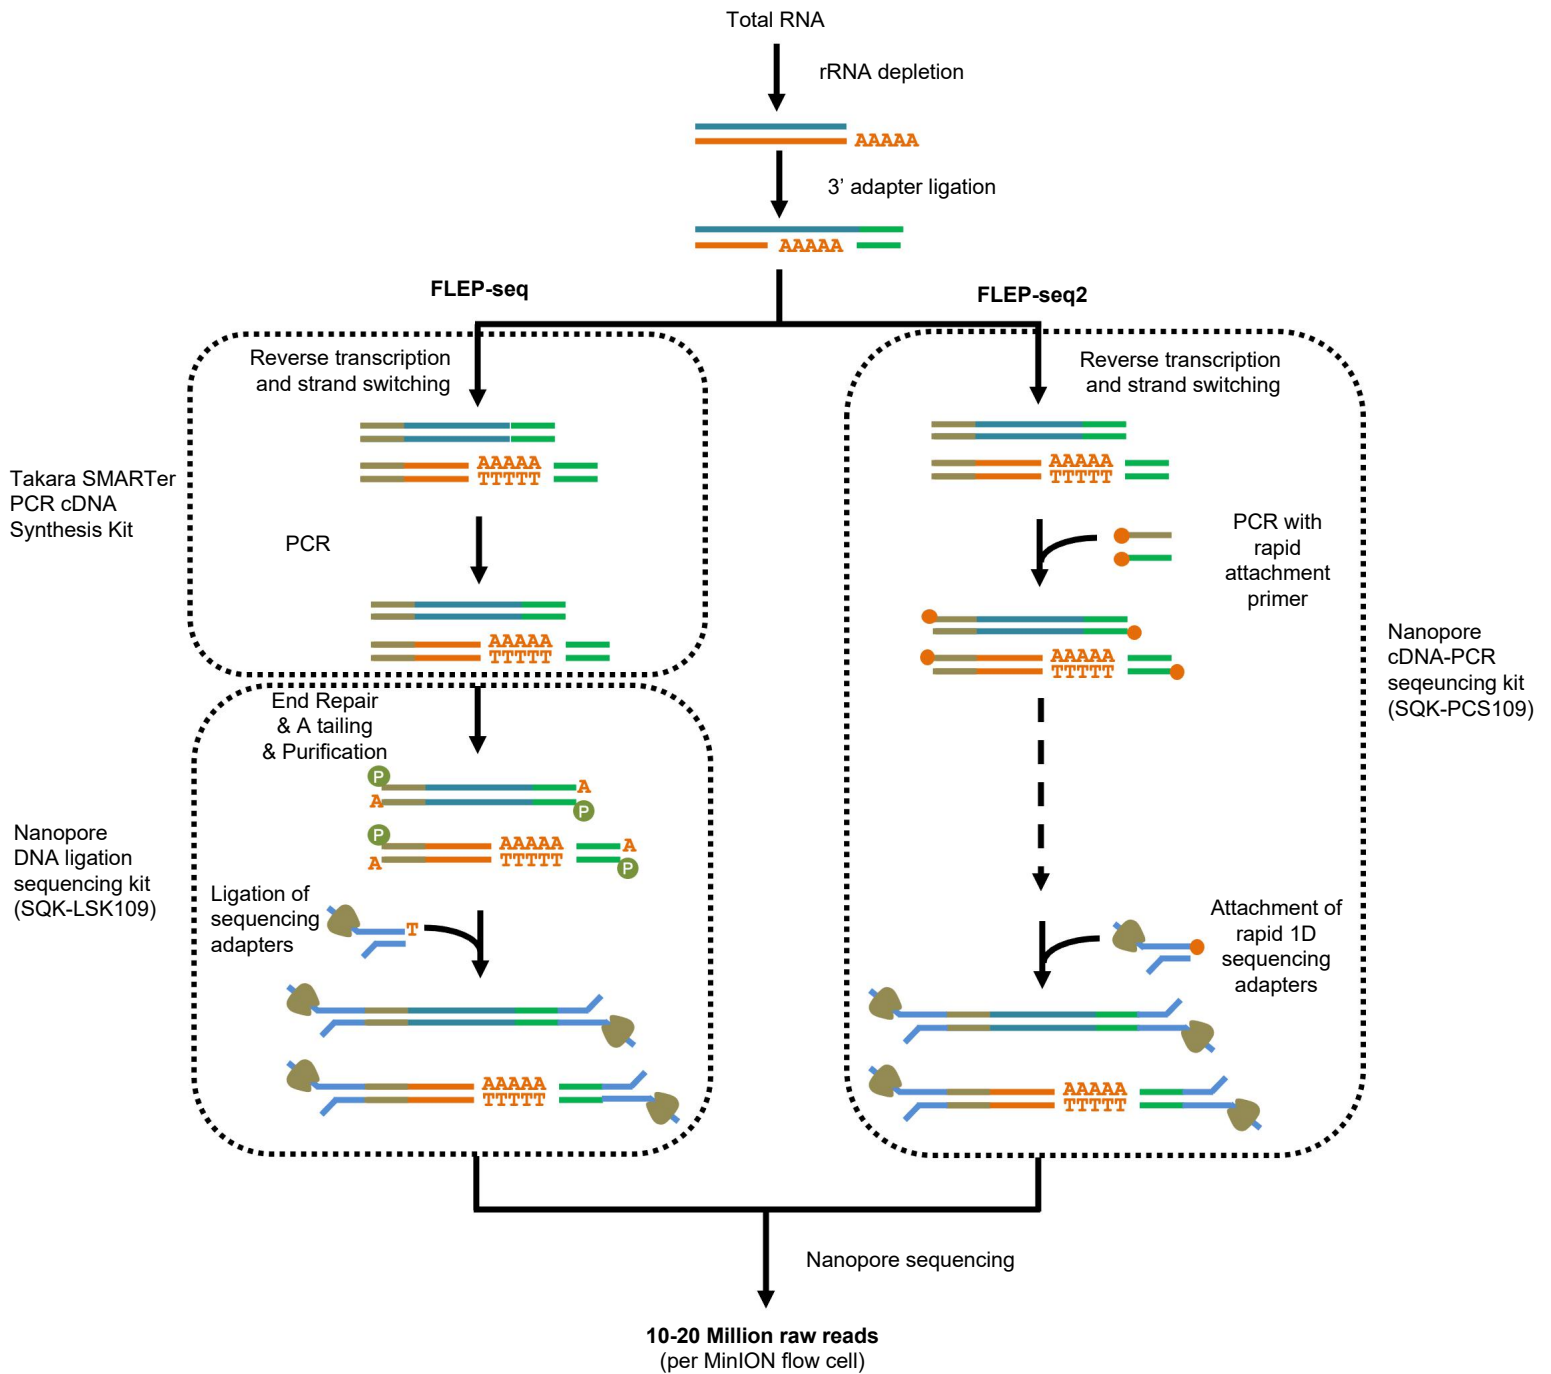

Supplemental Figure 1. The schematic diagram of FLEP-seq and FLEP-seq2

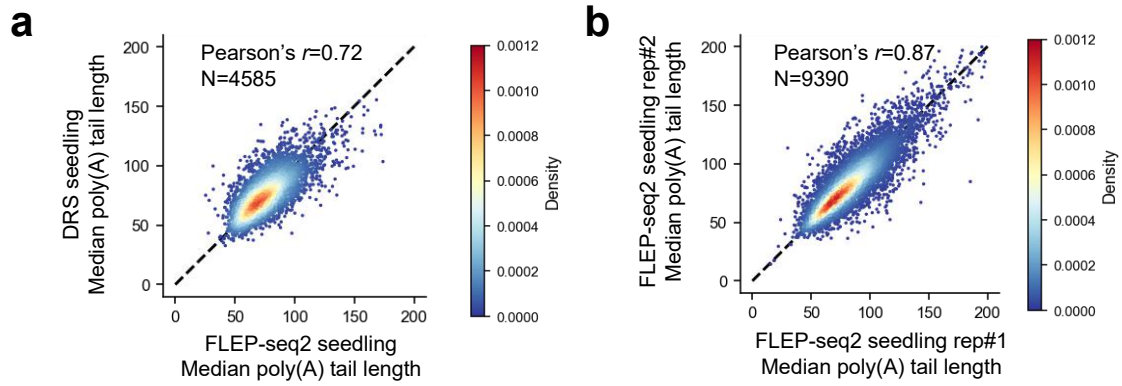

**Supplemental Figure 2. The measured median poly(A) lengths of genes are consistent between FLEP-seq2 and DRS dataset and between different biological replicates of FLEP-seq2. a.** The correlation of the median poly(A) tail lengths measured by FLEP-seq2 and Direct RNA sequencing (DRS). Only genes with at least 50 reads in both data set were used. **b.** The correlation of the median poly(A) tail lengths measured by FLEP-seq2 in two different biological replicates. Only genes with at least 50 reads in both samples were used.

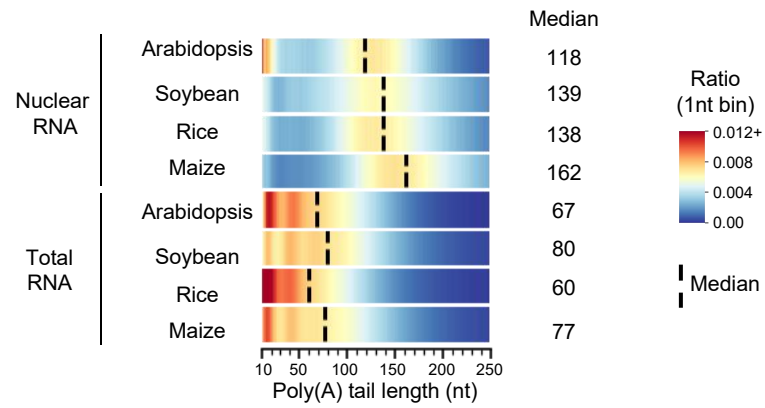

**Supplemental Figure 3. The poly(A) tail length distribution of total RNA and nuclear RNA in different species**

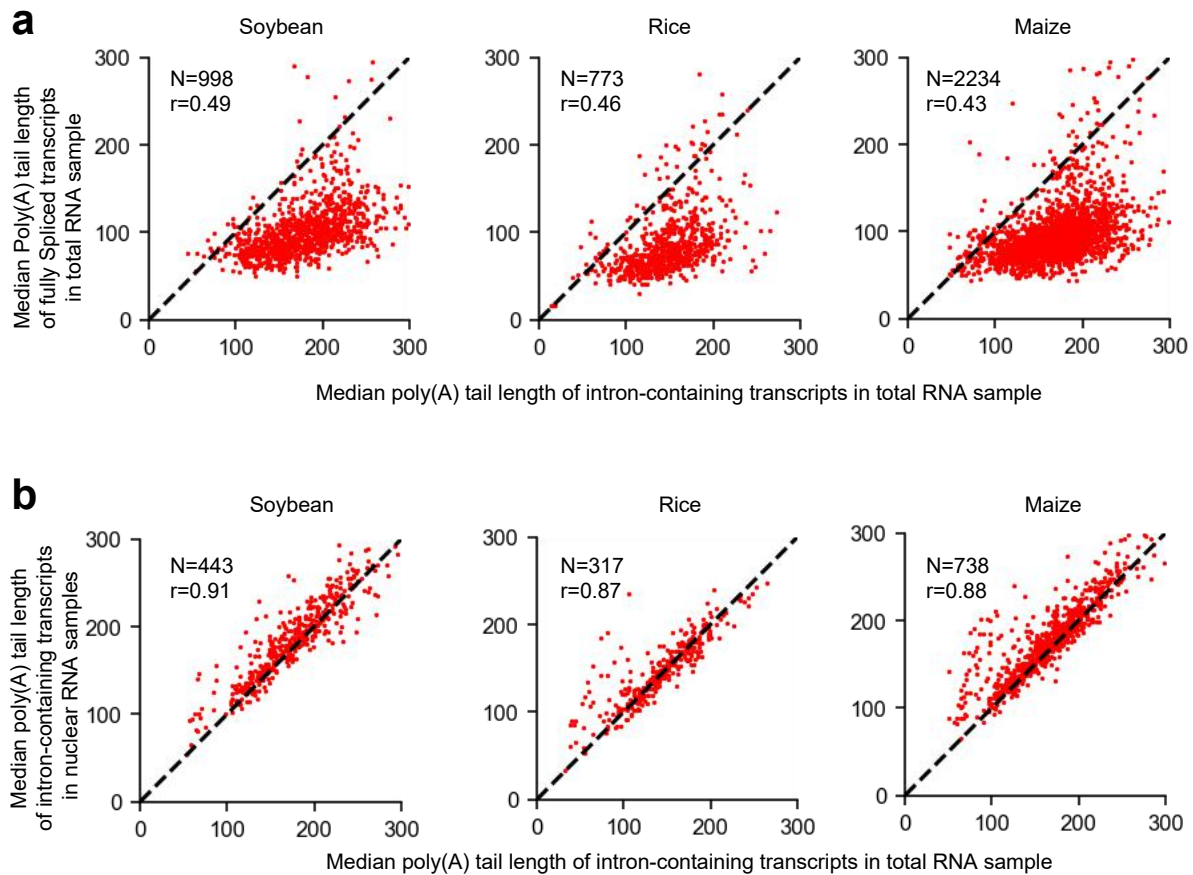

**Supplemental Figure 4. Comparison of the poly(A) tail length of intron-containing transcripts and fully-spliced transcripts. a,** The comparison of median poly(A) tail lengths between fully spliced transcripts and intron-containing (with introns) transcripts in total RNA samples. Only transcripts spanning all annotated introns were used, and only genes with at least 20 fully spliced reads and 20 intron-containing reads were used. **b,** The comparison of median poly(A) tail lengths of intron-containing transcripts between nuclear and total RNA samples in different species. Only the transcripts spanning all annotated introns were used, and only genes with at least 20 intron-containing transcripts in both nuclear and total RNA libraries were used. N: gene number. The Pearson's  $r$  values were labeled upper each figure.

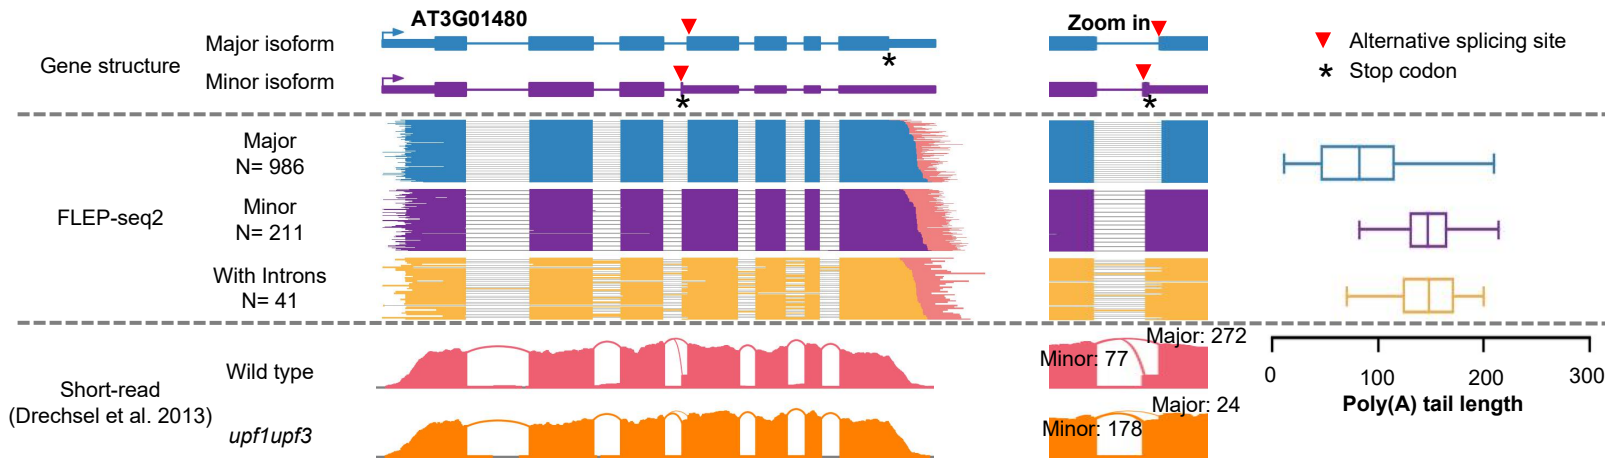

Supplemental Figure 5. Example of alternative splicing isoforms showing differential poly(A) tail lengths.



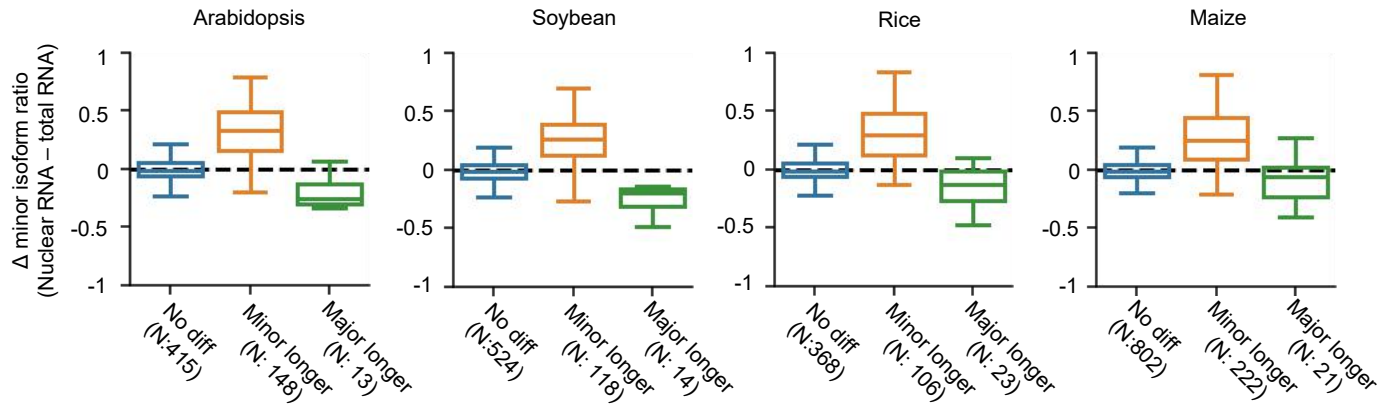

**Supplemental Figure 6. Boxplot showing the distribution of  $\Delta$  minor isoform ratio (minor/[minor+major]) between nuclear RNAs and total RNAs. The sums of the number of minor and major isoform reads in both nuclear and total RNA samples are required to be more than 10.**

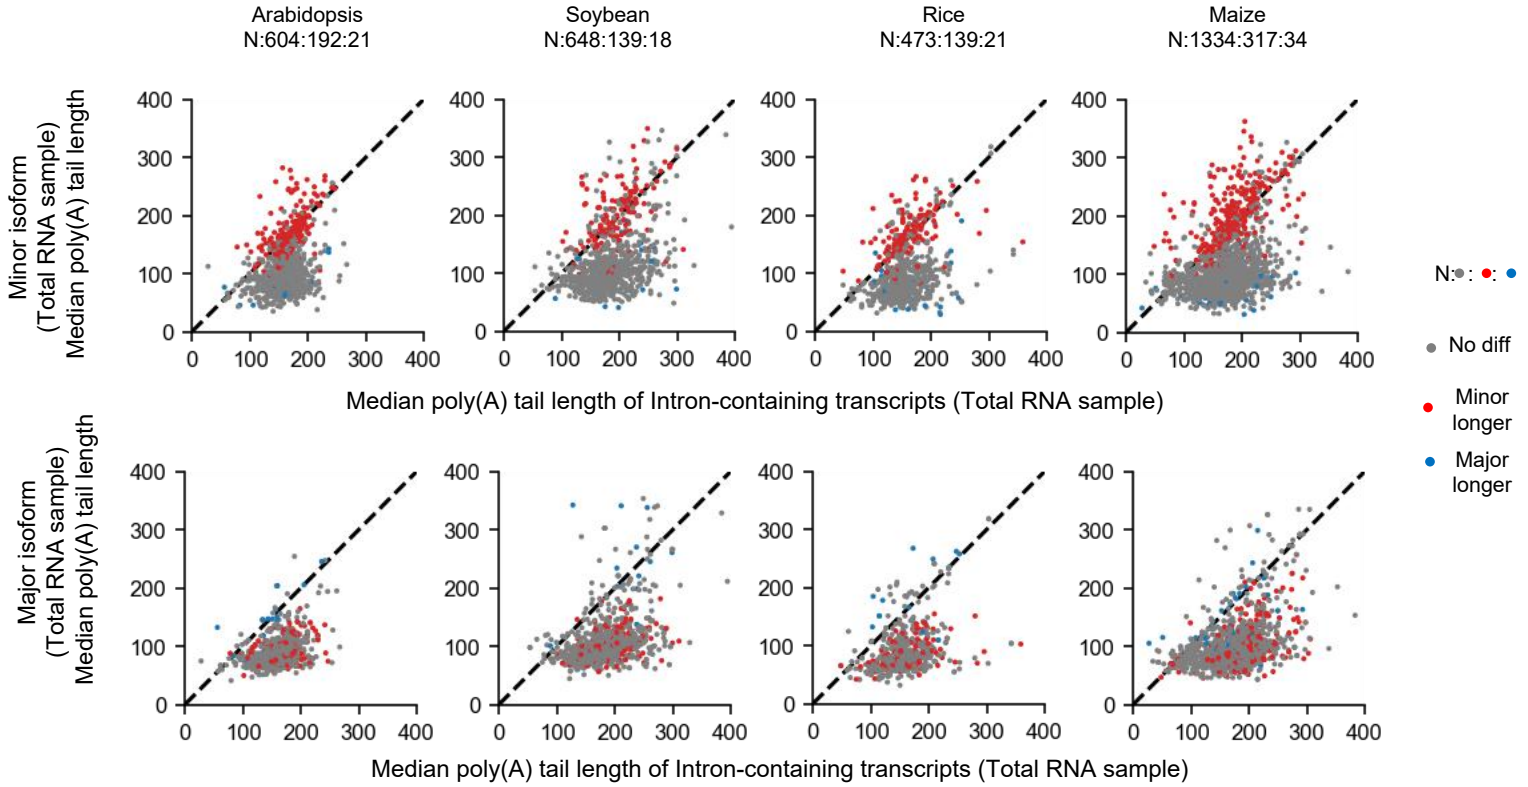

**Supplemental Figure 7. The poly(A) tail lengths of minor isoforms with longer tail than major isoforms are highly consistent with the poly(A) tail of intron-containing transcripts.** The comparison of median poly(A) tail lengths between intron-containing transcripts with minor isoforms (upper) or major isoforms (below) in total RNA samples of different species. Only genes with at least 20 minor isoform reads, 20 major isoform reads and 20 intron-containing reads were used. The numbers of isoforms showing no differential, longer, and shorter poly(A) tails were separated with ":" and labeled above each figure.

**a**

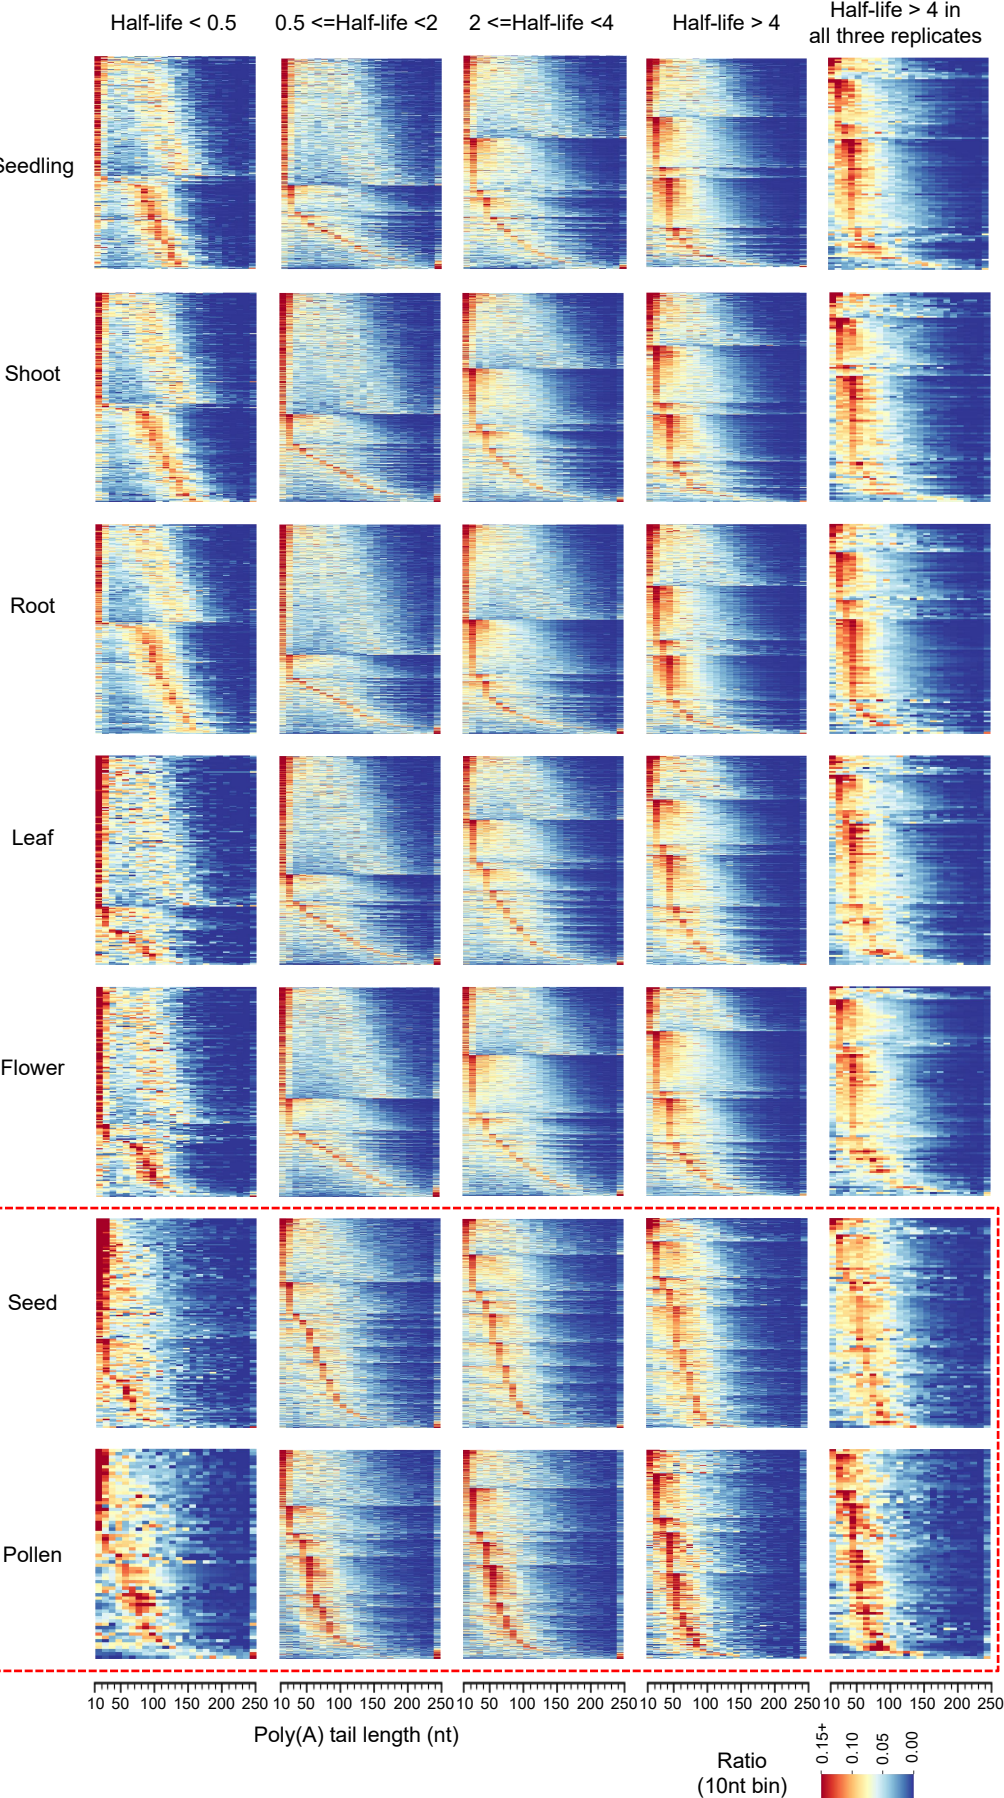

**b**

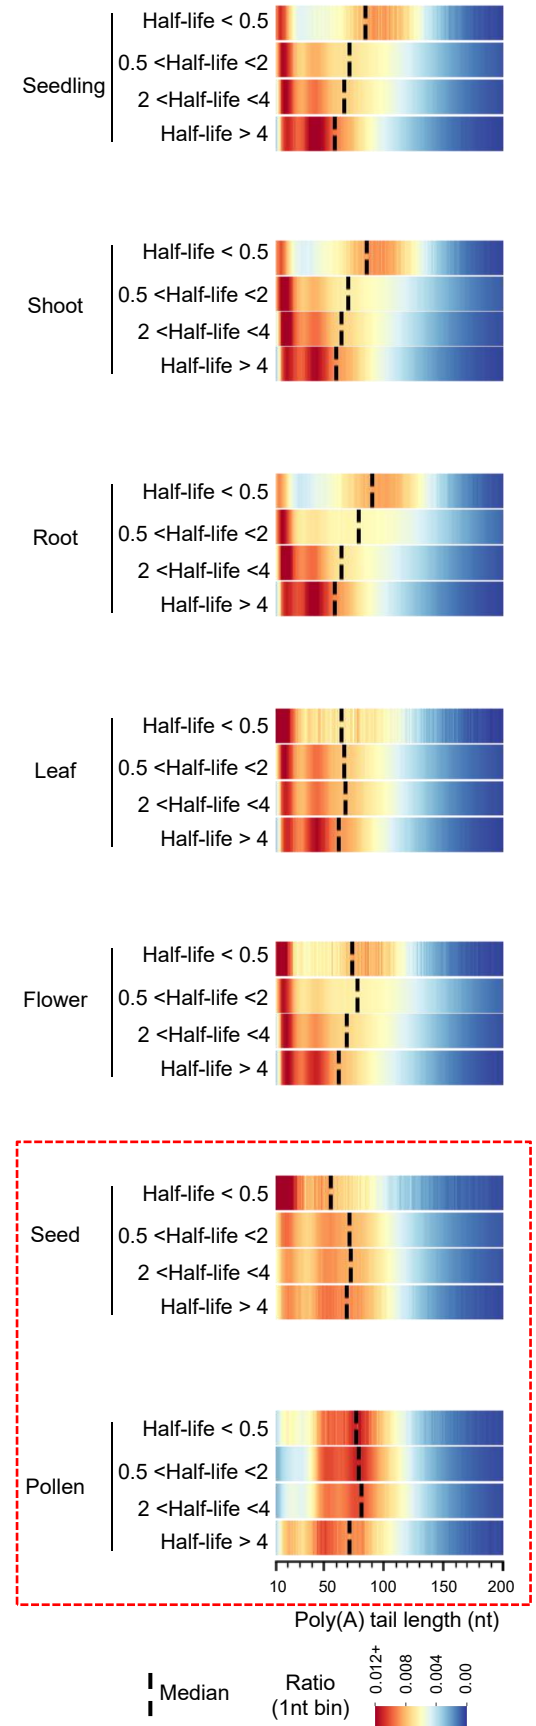

**Supplemental Figure 8. The poly(A) tail lengths of transcripts with short half-lives in seedling are also enriched at 50-100 nt in pollen.** **a**, Heatmap plot showing the poly(A) tail length distribution of genes showing different half-lives. The mRNA half-life data of seedling was reported in previous paper (Szabo et al., 2020). Each row in the plot represent the poly(A) tail length distribution a one gene. Only genes with at least 50 reads were used. N: gene number. **b**, The bulk poly(A) tail length distribution of genes with different mRNA half-lives.

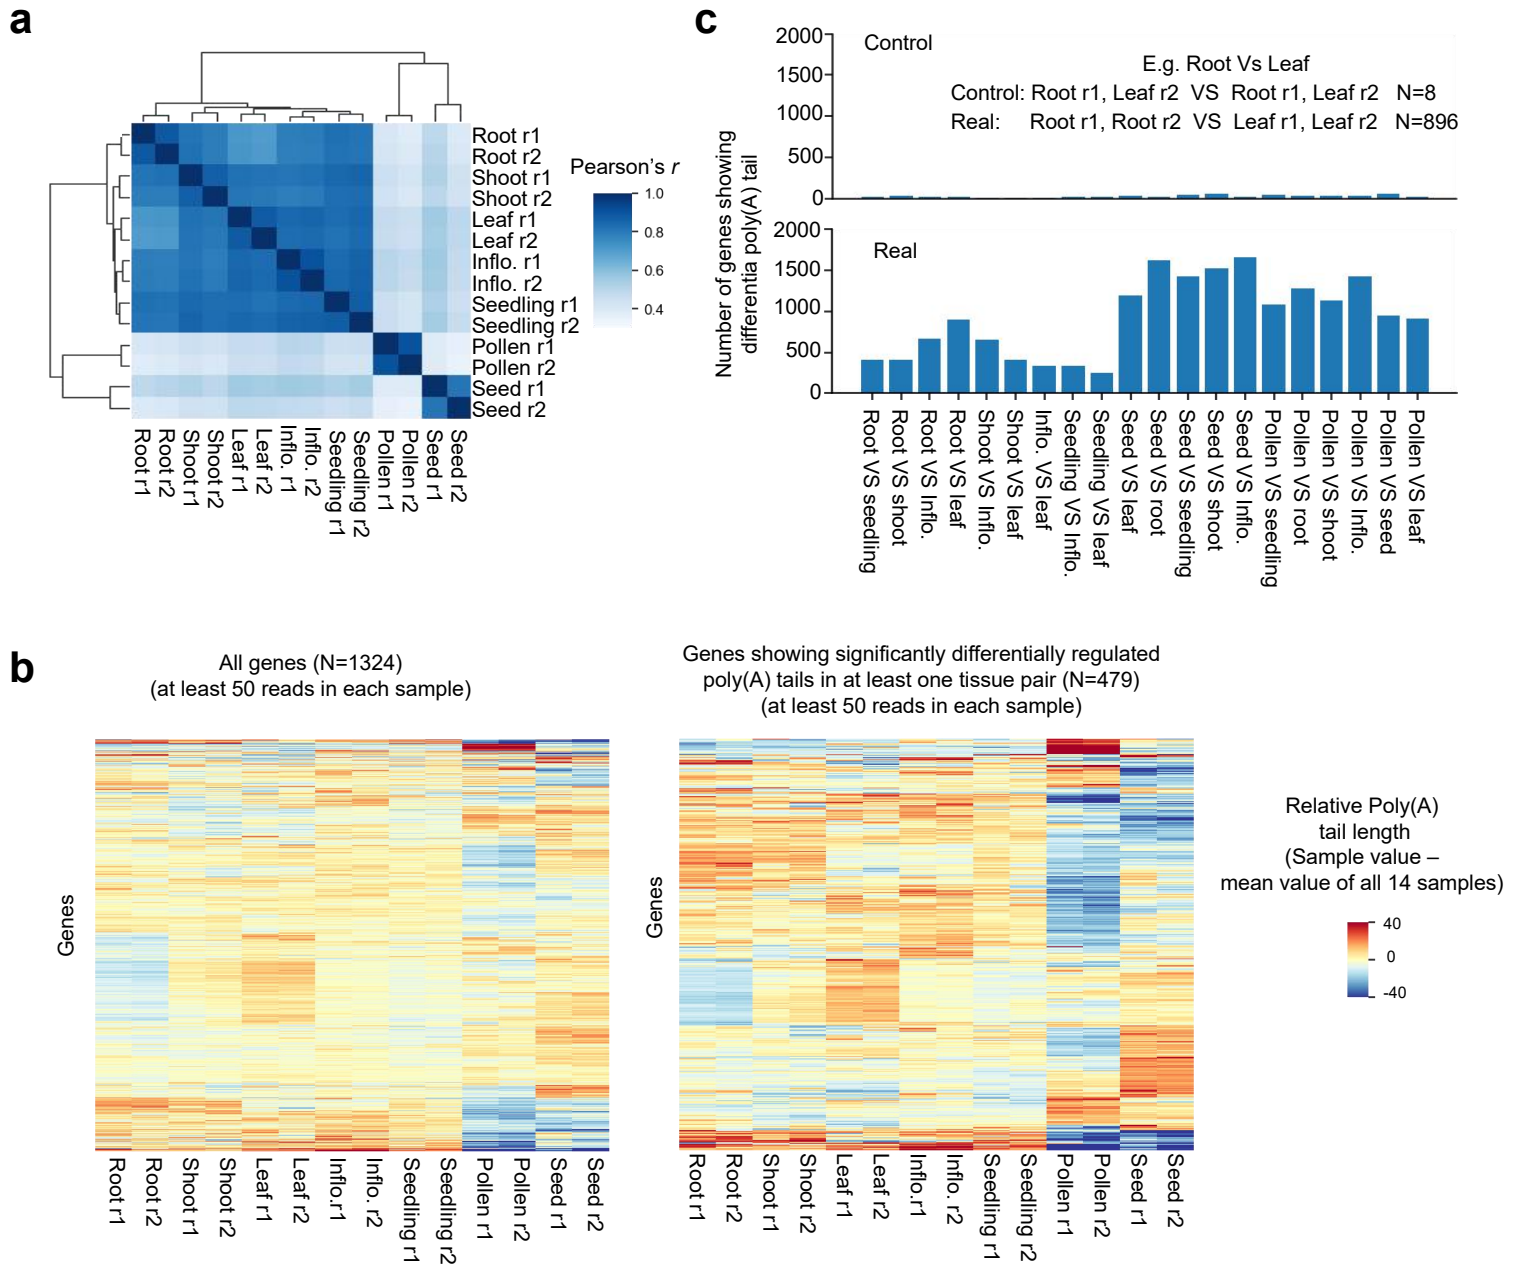

**Supplemental Figure 9. Tissue-specific and evolutionarily-conserved regulation of poly(A) tail length in Arabidopsis.** **a**, The median poly(A) tail length correlation matrix of different samples. **b**, Heatmap plot showing the relative median poly(A) tail length of genes among different tissues. **c**, The number of genes identified to show differential poly(A) tail length distribution in different tissues (Real, bottom panel) and in random data (Control, upper panel). Info.: Inflorescence. r1: biological replicate 1; r2: biological replicate 2.



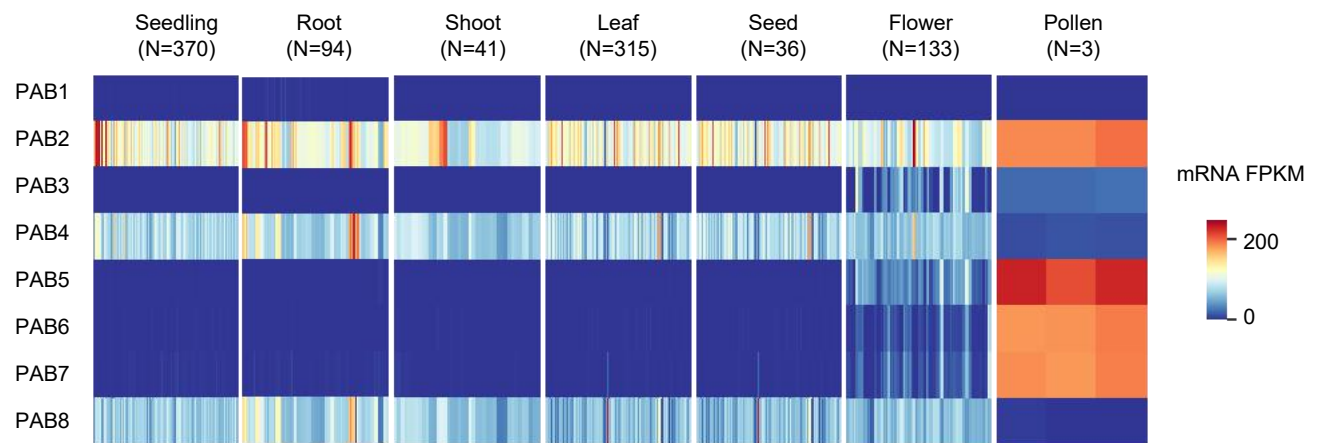

**Supplemental Figure 10. Tissue-specific expression of Arabidopsis genes coding Poly(A) binding proteins (PAB).** The gene expression values (Fragments per kilobase per million mapped fragments, FPKM value) of PABs in public RNA-seq data are downloaded from <http://ipf.sustech.edu.cn/pub/athrna/>. N: the number of RNA-seq libraries.
